1 **Cargo receptor-assisted endoplasmic reticulum**  
2 **export of pathogenic  $\alpha$ 1-antitrypsin polymers**

3

4 **Running title: Trafficking of polymeric  $\alpha$ 1-antitrypsin**

5

6 **Adriana Ordonez\***, Heather P Harding, Stefan J Marciniak, David Ron.

7 Cambridge Institute for Medical Research (CIMR), University of Cambridge,  
8 Cambridge Biomedical Campus, The Keith Peters Building, Cambridge CB2 0XY,  
9 United Kingdom.

10

11 **\*Corresponding author**

12 Adriana Ordonez, PhD. Cambridge Institute for Medical Research (CIMR), University  
13 of Cambridge, Cambridge Biomedical Campus, The Keith Peters Building, Cambridge  
14 CB2 0XY, United Kingdom.

15 Email: [aog23@cam.ac.uk](mailto:aog23@cam.ac.uk)

16 Phone +44 1223 768 940

17

18

19 **Abstract**

20 Circulating polymers of alpha1-antitrypsin ( $\alpha$ 1AT) are chemo-attractant for neutrophils  
21 and contribute to inflammation in pulmonary, vascular and adipose tissues. Cellular  
22 factors affecting the intracellular itinerary of mutant polymerogenic  $\alpha$ 1AT remain  
23 obscure. Here, we report on an unbiased genome-wide CRISPR/Cas9 screen for  
24 regulators of trafficking of the polymerogenic  $\alpha$ 1AT<sup>H334D</sup> variant. Single guide RNAs  
25 targeting genes whose inactivation enhanced accumulation of polymeric  $\alpha$ 1AT were  
26 enriched by iterative construction of CRISPR libraries based on genomic DNA from  
27 fixed cells selected for high polymer content by fluorescence-activated cell sorting.  
28 This approach bypassed the limitation to conventional enrichment schemes imposed  
29 by cell fixation and identified 121 genes involved in polymer retention at false  
30 discovery rate < 0.1. From that set of genes, the pathway 'cargo loading into COPII-  
31 coated vesicles' was overrepresented with 16 significant genes, including two  
32 transmembrane cargo receptors, LMAN1 (ERGIC-53) and SURF4. *LMAN1* and  
33 *SURF4*-disrupted cells displayed a secretion defect extended beyond  $\alpha$ 1AT  
34 monomers to polymers, whose low-level secretion was especially dependent on  
35 SURF4 and correlated with SURF4- $\alpha$ 1AT<sup>H334D</sup> physical interaction and with enhanced  
36 co-localisation of polymeric  $\alpha$ 1AT<sup>H334D</sup> with the endoplasmic reticulum (ER). These  
37 findings suggest that ER cargo receptors co-ordinate intracellular progression of  
38  $\alpha$ 1AT out of the ER and modulate the accumulation of polymeric  $\alpha$ 1AT not only by  
39 controlling the concentration of precursor monomers but also through a previously-  
40 unrecognised role in secretion of the polymers themselves.

41 (223 words)

42

43 **Keywords:**

44 Alpha1-antitrypsin; SURF4; LMAN1 (ERGIC-53); cargo receptors; polymer trafficking;  
45 endoplasmic reticulum; genome-wide CRISPR/Cas9 screen; CHO cells.

46

47

48

49

## 50 Introduction

51 Alpha1-Antitrypsin ( $\alpha$ 1AT) (*SERPINA1*) is a glycoprotein synthesised primarily in  
52 hepatocytes and secreted as a monomer into blood to constitute the most abundant  
53 SERine Protease INhibitor (SERPIN) in circulation. Its main function is to inhibit  
54 neutrophil elastase in lungs defending against excessive tissue degradation by the  
55 endogenous protease-enzyme activity ([Carrell and Lomas, 2002](#)).

56 Missense variants in *SERPINA1*, including the most-common Z variant (E342K),  
57 perturb the stability and conformation of  $\alpha$ 1AT monomers, resulting in their  
58 intracellular retention and formation of ordered and pathogenic polymers that  
59 accumulate within the lumen of the endoplasmic reticulum (ER) of hepatocytes.  
60 Intracellular retention is the basis of plasma  $\alpha$ 1AT deficiency underlying early-onset  
61 emphysema ([Gooptu et al., 2014](#)). Accumulation of polymers within liver cells is also  
62 associated with a toxic gain-of-function that predisposes to neonatal hepatitis and  
63 hepatocellular carcinoma ([Eriksson et al., 1986](#)). Interestingly, only 10-15% of  
64 patients develop severe liver pathology, suggesting variation in the handling of  
65 intracellular polymers ([Wu et al., 1994](#)).

66 Whilst  $\alpha$ 1AT polymers are most abundant intracellularly, polymers have also been  
67 identified in circulation ([Tan et al., 2014](#)) and in tissues; in the skin and kidney of  
68  $\alpha$ 1AT-deficient patients with panniculitis ([Gross et al., 2009](#)) or vasculitis ([Morris et al.,](#)  
69 [2011](#)) and in bronchoalveolar lavage fluid of patients with lung disease ([Morrison et](#)  
70 [al., 1987](#)). *In vitro* ([Mulgrew et al., 2004](#)) and *in vivo* studies ([Mahadeva et al., 2005](#))  
71 implicate extracellular polymers as chemo-attractants for human neutrophils that  
72 could contribute to inflammation and lung damage and less common extra-pulmonary  
73 manifestations of  $\alpha$ 1AT deficiency ([Gooptu and Lomas, 2008](#)).

74 Despite its importance to disease development, the processing and fate of  
75 intracellular polymers remain poorly understood. Both autophagy and ER-associated  
76 degradation (ERAD) have been implicated in their clearance ([Kroeger et al., 2009](#)).  
77 Less is known about how polymers reach the extracellular compartment. This has  
78 long been thought to be the result of either polymer release from dying cells or  
79 polymerisation of mutant  $\alpha$ 1AT secreted as monomers. Recently, studies of plasma of  
80  $\alpha$ 1AT-deficient patients before and after liver transplant ([Tan et al., 2014](#)) and cellular  
81 models suggest that circulating polymers are more likely to arise from secretion of

## Trafficking of polymeric alpha1-antitrypsin

82 pre-formed polymers rather than polymerisation extracellularly (Fra et al., 2016).  
83 Notably, levels of polymers in plasma from  $\alpha$ 1AT-deficient patients do not increase  
84 after incubation at 37°C for 3 days (Fra et al., 2016). This observation suggests that  
85 plasma levels of mutant polymerogenic  $\alpha$ 1AT (which are typically 10-15% the levels  
86 found in normal individuals) are below the threshold for aggregation. However, the  
87 processes underlying polymer secretion remain largely unknown.

88 Here, we performed a forward genetic screen to identify components affecting the  
89 intracellular levels of a highly polymerogenic  $\alpha$ 1AT variant, the King's mutant (H334D)  
90 (Miranda et al., 2010). Our observations indicate that  $\alpha$ 1AT polymers can be secreted  
91 from the cells by the canonical secretory pathway and identify LMAN1 and SURF4 as  
92 cargo receptors involved in the trafficking of monomeric and polymeric  $\alpha$ 1AT.

93

94

## 95 Results

### 96 *Flow cytometry-based assay to monitor intracellular $\alpha$ 1AT polymers*

97 To identify genes that modify intracellular levels of  $\alpha$ 1AT polymers, we developed a  
98 quantitative fluorescence-activated cell sorting (FACS)-compatible readout for the  
99 abundance of intracellular polymers using the well-described  $\alpha$ 1AT polymer-specific  
100 monoclonal antibody 2C1 (Mab2C1) (Miranda et al., 2010) in a previously-  
101 characterised CHO-K1 cell line (Ordonez et al., 2013). These cells express the  
102 polymerogenic variant (H334D) of  $\alpha$ 1AT, under control of a tetracycline-inducible  
103 (Tet-on) promoter that enables tight regulation of  $\alpha$ 1AT expression (Fig. S1A). A  
104 derivative CHO-K1 Tet-on\_ $\alpha$ 1AT<sup>H334D</sup> clone that stably expresses Cas9 and  
105 maintained parental regulation of Tet-inducible  $\alpha$ 1AT<sup>H334D</sup> expression was selected for  
106 screening.

107 To favour an experimental system that could respond to genetic perturbations with an  
108 increase in intracellular  $\alpha$ 1AT<sup>H334D</sup> polymers, cells were treated with a range of  
109 concentrations of doxycycline in the absence or presence of BafilomycinA1, an  
110 inhibitor of lysosomal activity. BafilomycinA1 enhances accumulation of  $\alpha$ 1AT  
111 polymers (Kroeger et al., 2009) and proved useful in exploring the dynamic range of  
112 the assay. Doxycycline at 5-50 ng/ml was associated with low basal levels of

## Trafficking of polymeric alpha1-antitrypsin

113 Mab2C1-staining that increased conspicuously upon BafilomycinA1 treatment,  
114 suggesting a suitable assay window for the screen (Fig. S1B).

115

### 116 ***A genome-wide screen identifies a set of genes affecting the intracellular*** 117 ***itinerary of polymerogenic $\alpha$ 1AT***

118 CHO-K1 Tet-on\_ $\alpha$ 1AT<sup>H334D</sup>\_Cas9 cells were initially transduced with a genome-wide  
119 CRISPR/Cas9 knockout library (Lib<sub>0</sub>) comprising 125,030 single guide RNAs  
120 (sgRNAs) (Fig. 1A).  $\alpha$ 1AT<sup>H334D</sup> expression was then induced with doxycycline  
121 followed, 24 hrs later by fixation, permeabilisation and staining with the Mab2C1  
122 primary antibody. Cells were FACS sorted into 3 bins based on Mab2C1-dependent  
123 fluorescence intensity: 'brightest', 'medium-bright' and 'dull' (Fig. 1B).

124 Cell fixation, required to detect intracellular polymers, precluded conventional  
125 enrichment schemes through successive rounds of phenotypic selection and  
126 expansion of the pooled cells. To circumvent this impasse, we implemented an  
127 approach based on recovery of sgRNA sequences from phenotypically-selected cell  
128 populations (Fig. 1A,B). Genomic DNA from the 'brightest'-sorted cells was extracted  
129 and fragments covering integrated sgRNA sequences were PCR-amplified and used  
130 to generate a derivative CRISPR library (Fig. 1A, lower segment). The derivative  
131 library (Lib<sub>1</sub>), enriched in viral particles bearing phenotype-linked sgRNA sequences,  
132 was transduced into parental CHO-K1 Tet-on\_ $\alpha$ 1AT<sup>H334D</sup>\_Cas9 cells followed by  
133 further phenotypic selection and generation of a second, enriched derivative library  
134 (Lib<sub>2</sub>, Fig. 1B). Transduction with Lib<sub>0</sub>, Lib<sub>1</sub> and Lib<sub>2</sub> progressively increased  
135 intracellular  $\alpha$ 1AT polymers, as assessed by FACS (Fig. 1B) and ELISA (Fig. 1C).

136

## Trafficking of polymeric alpha1-antitrypsin

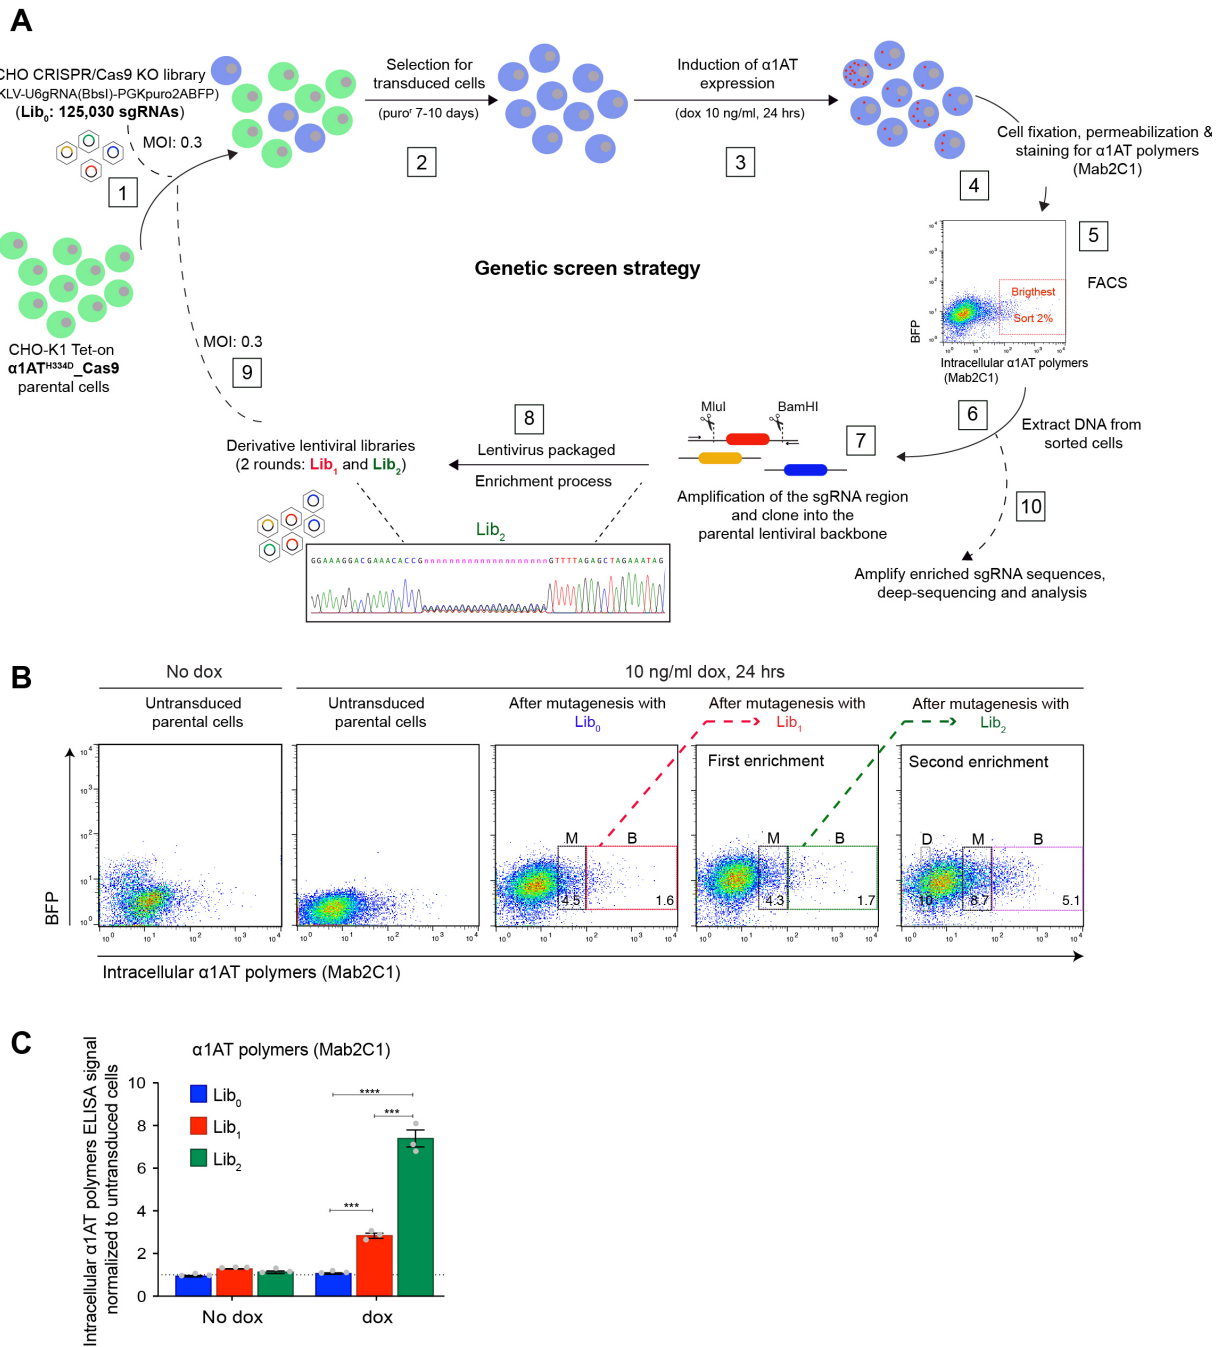

**Fig. 1. CRISPR/Cas9 screen to identify modifiers of intracellular levels of  $\alpha 1$ -antitrypsin polymers.** (A) Workflow of a genome-wide CRISPR/Cas9 knockout (KO) screen. CHO-K1 cells expressing Cas9 and a Tet-inducible allele of  $\alpha 1AT^{H334D}$  were transduced at low multiplicity of infection (MOI: 0.3) with a lentiviral library of sgRNAs targeting the whole CHO genome ( $Lib_0$ ) [1]. Transduced cells were selected for presence of the puromycin resistance marker [2]. Expression of the  $\alpha 1AT^{H334D}$  transgene was induced with doxycycline (dox) [3]. Cells were fixed and stained for polymeric  $\alpha 1AT$  using the polymer-specific monoclonal antibody 2C1 (Mab2C1) [4] and FACS sorted based on signal intensity [5]. Genomic DNA was extracted from pools of cells with the highest level of polymer signal ('brightest') [6] and used to amplify enriched sgRNA sequences to create new lentiviral libraries ( $Lib_1$  and  $Lib_2$ ). Sanger sequencing indicates the presence of sgRNA sequence diversity in the new

## Trafficking of polymeric alpha1-antitrypsin

lentiviral Lib<sub>2</sub> [7 & 8]. The selection cycle was repeated [9] and at its conclusion [10] genomic DNA from the selected cells was prepared for high throughput sequencing and analysis of the successively enriched sgRNA sequences. **(B)** Dual-channel flow cytometry of intracellular levels of α1AT polymers (stained with Mab2C1) and BFP (transduction marker) in α1AT<sup>H334D</sup>-expressing cells before and after transduction with Lib<sub>0</sub> (unenriched library), and successively-enriched Lib<sub>1</sub> and Lib<sub>2</sub>. The boxed areas include the cells sorted for genomic analysis: 'brightest' (B), 'medium-bright' (M) and 'dull' (D). **(C)** Intracellular α1AT polymer signals quantified by sandwich ELISA of unsorted cells, transduced with Lib<sub>0</sub>, Lib<sub>1</sub> and Lib<sub>2</sub>, respectively, in the presence or absence of doxycycline (dox; 10 ng/ml, 24 hrs). Shown is the mean ± SEM normalised to untransduced cells of three independent experiments. \*\*\*, P < 0.001; and \*\*\*\*, P < 0.0001. Unpaired t-test.

137

138 Next, genomic DNA, pooled from sorted cells in the different bins at different stages  
139 of the phenotypic enrichment process and from unsorted control cells, was subjected  
140 to high-throughput sequencing and MAGeCK bioinformatics analysis (Li et al., 2014)  
141 to determine sgRNA sequence enrichment and the corresponding gene ranking list  
142 (Table S1). Quality control based on sgRNA sequence read counts showed that over  
143 90% of the reads mapped to the libraries (Fig. S2A). Distribution of normalised read  
144 counts indicated that after successive rounds of positive phenotypic selection the  
145 diversity of sgRNA species declined from libraries Lib<sub>0</sub> to Lib<sub>2</sub>, with increasing  
146 percentage of sgRNAs with zero read counts and sgRNA with very high counts (Fig.  
147 S2B,C).

148 Gene ontology (GO) analysis of the most significantly enriched genes in the 'brightest'  
149 Mab2C1-stained cells [with a false discovery rate (FDR) < 0.1] revealed that  
150 'regulation of chromosome organisation' was the strongest selected GO term (Fig.  
151 2A). This cluster, thought to reflect the indirect effects of altered transcriptional  
152 regulation on polymer levels, was not further considered. The second highly  
153 represented cluster was 'cargo loading into COPII-coated vesicle', which included 16  
154 genes that were significantly enriched during the selection process (Fig. 2A,B). These  
155 encode components of the coat protein II (COPII) complex that initiates vesicle  
156 budding at the ER (*SEC23B*, *SAR1A* and *SEC24B*), non-COPII proteins important to  
157 vesicle formation (*RAB1A*, *TFG*, *TRAPPC12* and *MAPK10*) (D'Arcangelo et al., 2013)  
158 and two cargo receptors with a known role in protein transport from ER to Golgi  
159 apparatus (*LMAN1* and *SURF4*) (Gomez-Navarro and Miller, 2016). In addition,  
160 protein-protein interaction network analysis of the proteins encoded by the 16

## Trafficking of polymeric alpha1-antitrypsin

161 identified genes revealed that 5 of them form an independent network, highlighting  
 162 their interconnectivity (Fig. 2C). Thus, this screen hints at an important role for the  
 163 early secretory pathway in specifying intracellular levels  $\alpha$ 1AT polymers (Fig. 2D).

164

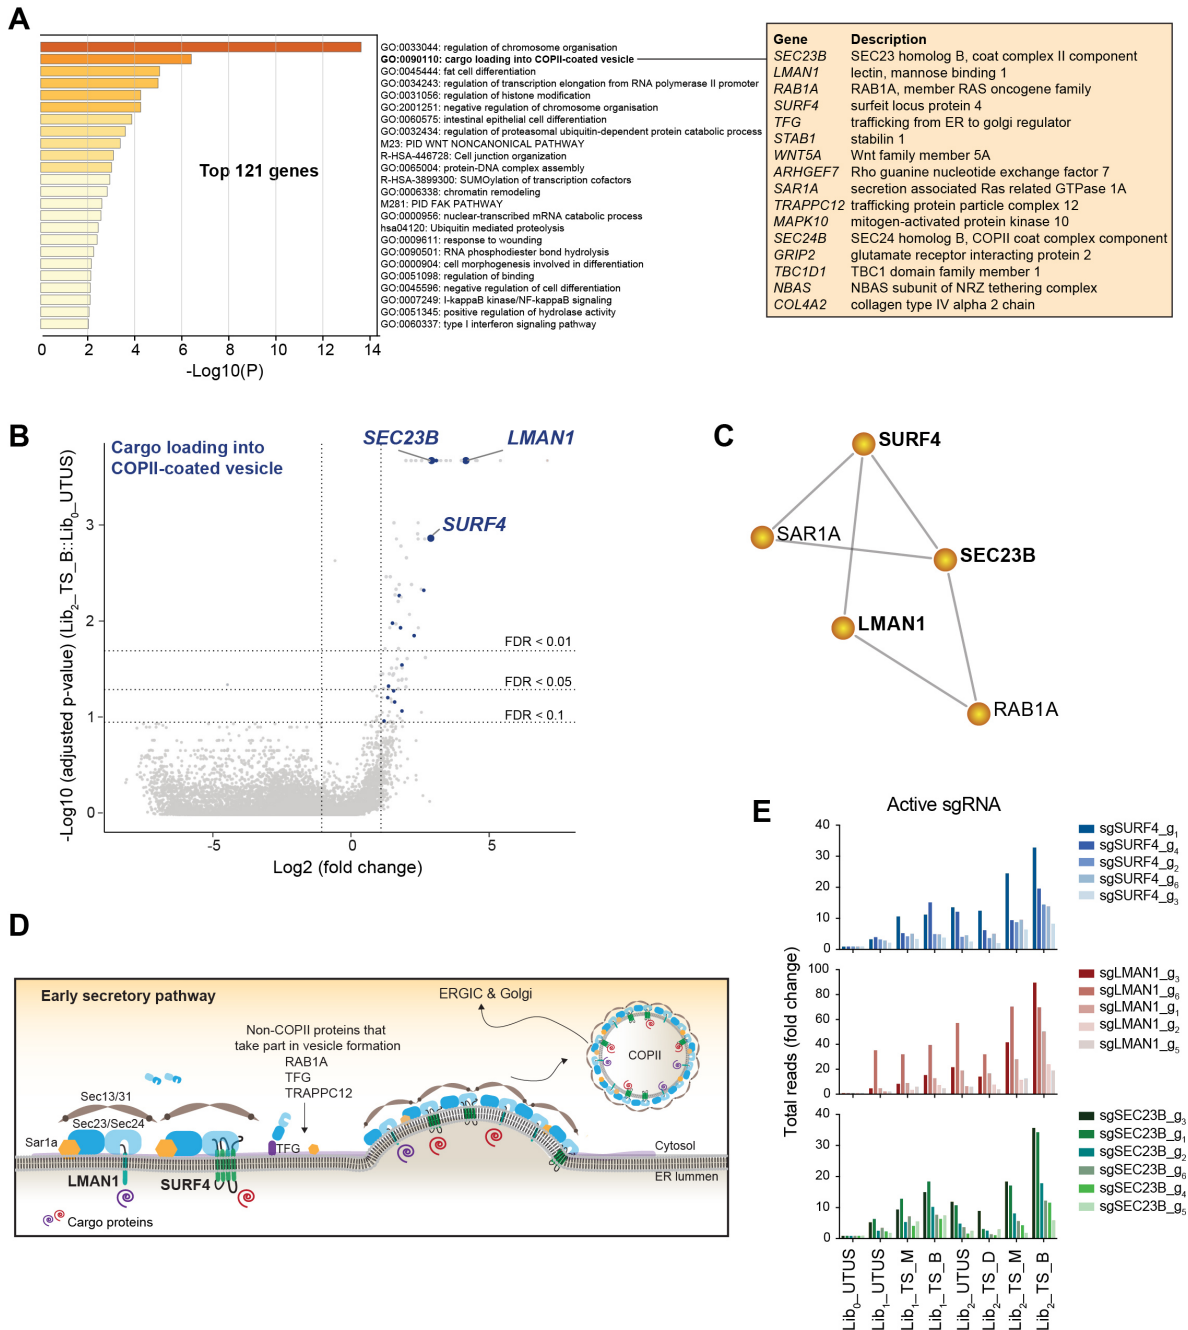

**Fig. 2. sgRNAs targeting genes encoding components of the early secretory pathway are enriched in cells with elevated intracellular  $\alpha$ 1-antitrypsin polymers. (A) Gene ontology (GO) enrichment analysis of the top 121 hits identified in the CRISPR screen and annotation of the 16 genes included in the GO term 'cargo loading into COPII-coated vesicle'. (B) Volcano plot showing the  $\text{Log}_2$  (fold change) and the  $\text{Log}_{10}$  (adjusted p-value) of the genes targeted by sgRNAs in 'treated and**



## Trafficking of polymeric alpha1-antitrypsin

sorted' (TS) cells transduced with Lib<sub>2</sub> versus 'untreated and unsorted' (UTUS) cells transduced with Lib<sub>0</sub>. Genes above the horizontal dashed lines were significantly enriched in Lib<sub>2</sub>. Genes of the GO term 'cargo loading into COPII-coated vesicle' are in blue. **(C)** Protein-protein interaction network (Metascape) of the 16 proteins encoded by the genes of the 'cargo loading into COPII-coated vesicle' cluster. **(D)** Cartoon of the early secretory pathway where relevant factors identified in the screen are depicted. **(E)** Total reads for each active sgRNA targeting the selected genes for validation.

165

### 166 ***Elevated intracellular $\alpha 1AT^{H334D}$ polymer levels in cells lacking SURF4, LMAN1*** 167 ***and SEC23B***

168 Of the genes targeted by guides enriched in the 'brightest' cells, we deemed those  
169 encoding proteins with an ER luminal domain that could interact with polymers to be  
170 of particular interest. LMAN1 (lectin mannose binding1) and SURF4 (surfeit protein  
171 locus 4), two transmembrane cargo receptors (Hauri et al., 2000; Reeves and Fried,  
172 1995), satisfied that criterion. Another highly enriched gene, SEC23B, encoding the  
173 cytosolic component of the COPII machinery (Jensen and Schekman, 2011), was  
174 included as a reference (Fig. 2A,B). Five of the six sgRNA targeting each of these  
175 three genes were significantly enriched in the 'brightest' population, adding  
176 confidence that they represent reliable hits (Fig. 2E).

177 To validate the genotype-phenotype relationship suggested by the screen, SURF4,  
178 LMAN1 and SEC23B were re-targeted by CRISPR/Cas9-mediated gene disruption in  
179 parental CHO-K1 Tet-on\_ $\alpha 1AT^{H334D}$  cells, using two guides mapping to separate  
180 exons (Fig. 3A). Cells expressing wild-type  $\alpha 1AT$  (Ordonez et al., 2013) were also  
181 targeted. Clonal knockout derivative cell lines were validated by genomic sequencing  
182 and, in case of SURF4 and LMAN1, by evidence for depletion of the proteins by  
183 immunoblotting (Fig. 3B,C).

184 Disruption of SURF4, LMAN1 and SEC23B increased intracellular polymer levels as  
185 assessed by flow cytometry after immunostaining of polymeric  $\alpha 1AT^{H334D}$  (Fig. 3D).  
186 These observations were confirmed by ELISA with two different antibodies: the  
187 polymer-specific Mab2C1 and a monoclonal antibody that recognises all  $\alpha 1AT$   
188 conformers (Mab3C11) (Fig. 3E).

## Trafficking of polymeric alpha1-antitrypsin

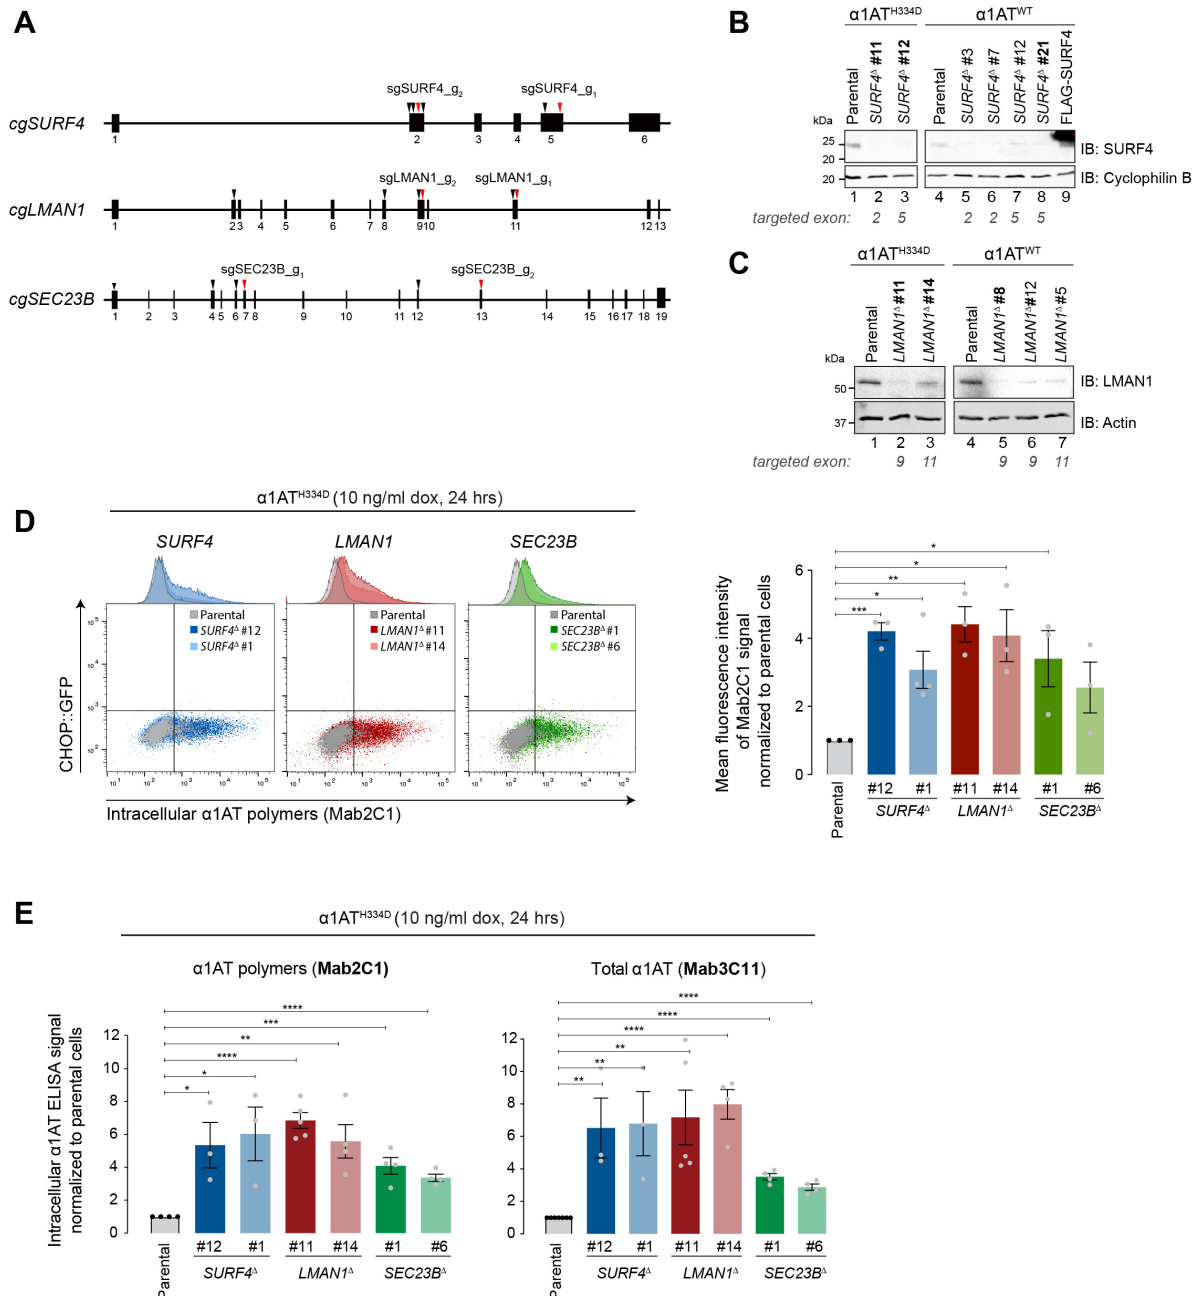

**Fig. 3. Disruption of *SURF4*, *LMAN1* and *SEC23B* increases the intracellular levels of  $\alpha 1$ -antitrypsin polymers in CHO-K1 cells. (A) Diagrams of the *Cricetulus griseus* *SURF4*, *LMAN1* and *SEC23B* loci showing the target sites of the 6 sgRNAs (arrowheads) included in the CRISPR/Cas9 library. Red arrowheads indicate sgRNAs selected for validation. (B and C) Immunoblots of SURF4 (upper panel) and LMAN1 (lower panel) in lysates of parental CHO-K1 Tet-on cells expressing either  $\alpha 1\text{AT}^{\text{H334D}}$  or  $\alpha 1\text{AT}^{\text{WT}}$  and several *SURF4* and *LMAN1* deleted derivatives. In bold, clones selected for functional experiments. Lysate of parental cells transfected with a FLAG-SURF4-encoding plasmid served as a positive control. (D) Dual-channel flow cytometry of intracellular levels of  $\alpha 1\text{AT}$  polymers and *CHOP::GFP* in CHO-K1 parental Tet-on\_ $\alpha 1\text{AT}^{\text{H334D}}$  cells and two independent clones where *SURF4*, *LMAN1* or *SEC23B* were disrupted. The bar graph shows the mean  $\pm$  SEM of the Mab2C1-signal normalised to doxycycline-treated parental cells from three or four independent**

## Trafficking of polymeric alpha1-antitrypsin

experiments. **(E)** As in 'D' but plotting the intracellular  $\alpha$ 1AT signal from sandwich ELISA assays using the anti-polymer Mab2C1 (left panel) and the anti-total  $\alpha$ 1AT Mab3C11 (right panel). \*,  $P < 0.05$ ; \*\*,  $P < 0.01$ ; \*\*\*,  $P < 0.001$ ; and \*\*\*\*,  $P < 0.0001$ . Unpaired t-test.

189  
190 *SURF4* and *LMAN1*, confirmed above as genes whose inactivation enhances levels  
191 of intracellular polymeric  $\alpha$ 1AT<sup>H334D</sup>, play a broad role in trafficking of cargo out of the  
192 ER. Perturbations in ER function caused by protein misfolding or by impeded egress  
193 of proteins from the ER lead to ER stress and trigger the unfolded protein response  
194 (UPR), a protective and adaptive response aimed to re-establish ER homeostasis  
195 (Walter and Ron, 2011). Notably, *in vitro* studies indicate that Brefeldin A, an inhibitor  
196 of protein transport from ER to the Golgi apparatus, leads to the activation of the UPR  
197 (Citterio et al., 2008). Therefore, to gauge the contribution of any general perturbation  
198 to ER function that may arise from the inactivation of such genes, we turned to CHO-  
199 K1 S21 cells bearing *CHOP::GFP* and *XBP1s::Turquoise* unfolded protein response  
200 (UPR) reporters (Sekine et al., 2016). *SURF4* and *LMAN1* were inactivated by sgRNA  
201 whose expression was linked to a mCherry reporter. This enabled scoring UPR  
202 activation in populations of mutant cells, free of the bias that might otherwise be  
203 introduced by clonal selection. No induction of the UPR reporters was observed  
204 following *SURF4* and *LMAN1* inactivation. Inactivation of *HSPA5*, encoding the ER  
205 chaperone BiP, a positive control, strongly inducing both UPR branches (Fig. 4).  
206 These observations indicate that inactivation of *SURF4* and *LMAN1* did not globally  
207 perturb ER protein homeostasis and suggested that the observed increase in  
208 polymers may arise by a more specific mechanism.

## Trafficking of polymeric alpha1-antitrypsin

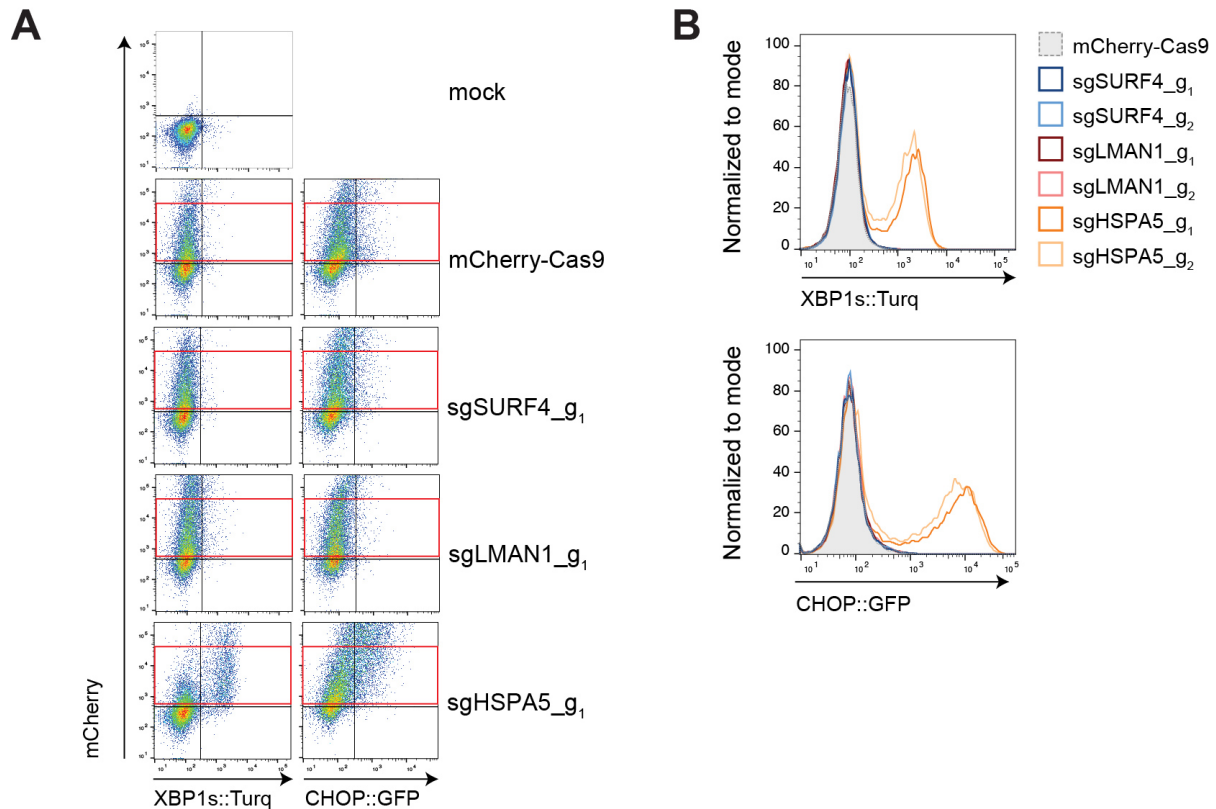

**Fig. 4. SURF4 and LMAN1 depletion does not activate the unfolded protein response. (A)** Dual-channel flow cytometry of *XBP1s::Turquoise* or *CHOP::GFP* and mCherry in CHO-K1 S21 cells transiently transfected with sgRNA-mCherry-Cas9 plasmids targeting *SURF4*, *LMAN1* and *HSPA5* (BiP protein). Dot-plots are representative of one experiment. The red rectangles delineate cells expressing moderate levels of mCherry-tagged plasmid selected for the histogram shown in 'B'. **(B)** Distribution of the *XBP1s::Turquoise* and *CHOP::GFP* signals, in mCherry-positive cells gated by red rectangles in 'A'. The same experiment was repeated with equal results using a second sgRNA for each gene.

209

### 210 *LMAN1* and *SURF4* promote trafficking of $\alpha$ 1AT in CHO-K1 cells

211 *LMAN1* has been previously implicated in mediating ER exit of wild-type monomeric  
212  $\alpha$ 1AT (Nyfeler et al., 2008; Zhang et al., 2011). *SURF4*, by contrast, has been  
213 reported to lack such a function; at least in HEK293 cells (Emmer et al., 2018). To  
214 examine the roles of *SURF4* and *LMAN1* in the trafficking of polymeric  
215  $\alpha$ 1AT<sup>H334D</sup>, we performed pulse-chase experiments to compare the kinetics of  $\alpha$ 1AT  
216 secretion and the accumulation of polymers in parental, *SURF4*<sup>Δ</sup> and *LMAN1*<sup>Δ</sup> CHO-  
217 K1 Tet-on\_ $\alpha$ 1AT<sup>H334D</sup> cells. Cells were pre-treated with low concentration of  
218 doxycycline followed by radioactive pulse labelling for 20 min and a subsequent  
219 chase (Fig. 5A).  $\alpha$ 1AT immunoprecipitation from cell-lysates and culture media was

## Trafficking of polymeric alpha1-antitrypsin

220 performed with antibodies reactive with all forms of  $\alpha$ 1AT (total) or selective for  
221 polymers (Mab2C1) (Fig. 5B).  $\alpha$ 1AT contains three N-glycosylation sites. Thus, the  
222 ER-associated 52-kDa  $\alpha$ 1AT<sup>H334D</sup> species gradually appeared in the culture media as  
223 mature-glycosylated species of 55-kDa (Fig. 5B). Disruption of *LMAN1*, and to a  
224 lesser degree *SURF4*, led to a significant defect in the clearance of the ER form and  
225 appearance of the mature-glycosylated form in the culture media (Fig. 5B,C). This  
226 trend was even more conspicuous in terms of  $\alpha$ 1AT<sup>H334D</sup> polymer secretion as  
227 *LMAN1*<sup>Δ</sup> and *SURF4*<sup>Δ</sup> cells accumulated more intracellular polymers than parental  
228 cells (Fig. 5B,D). Similar findings were observed in an independently derived *SURF4*<sup>Δ</sup>  
229 clone (Fig. S3). Interestingly, both *LMAN1*<sup>Δ</sup> and *SURF4*<sup>Δ</sup> cells secreted proportionally  
230 fewer  $\alpha$ 1AT<sup>H334D</sup> polymers than parental cells (Fig. 5B,E).

231 Having confirmed a role for *LMAN1* and *SURF4* in trafficking of  $\alpha$ 1AT<sup>H334D</sup>, we then  
232 sought to determine their role in trafficking of  $\alpha$ 1AT<sup>WT</sup> in CHO cells. The same pulse-  
233 chase labelling procedure described above was applied to parental, *SURF4*<sup>Δ</sup> and  
234 *LMAN1*<sup>Δ</sup> CHO-K1 Tet-on- $\alpha$ 1AT<sup>WT</sup> cells. Clearance of wild-type, monomeric  $\alpha$ 1AT  
235 from the ER was significantly delayed in *LMAN1*<sup>Δ</sup> cells, consistent with previous  
236 observations (Nyfeler et al., 2008; Zhang et al., 2011), but also in *SURF4*<sup>Δ</sup> cells, albeit  
237 to a lesser degree (Fig. 5F,G). Of note, the accumulation of wild-type monomer in  
238 *SURF4*<sup>Δ</sup> and *LMAN1*<sup>Δ</sup> cells did not result in detectable polymer formation by ELISA.

239 These observations implicate both *LMAN1* and *SURF4* in trafficking of wild-type and  
240 polymerogenic  $\alpha$ 1AT in CHO-K1 cells. This explains enhanced intracellular  
241 accumulation of  $\alpha$ 1AT polymers observed in the  $\alpha$ 1AT<sup>H334D</sup>-expressing cells lacking  
242 either *LMAN1* or *SURF4*.

243

## Trafficking of polymeric alpha1-antitrypsin

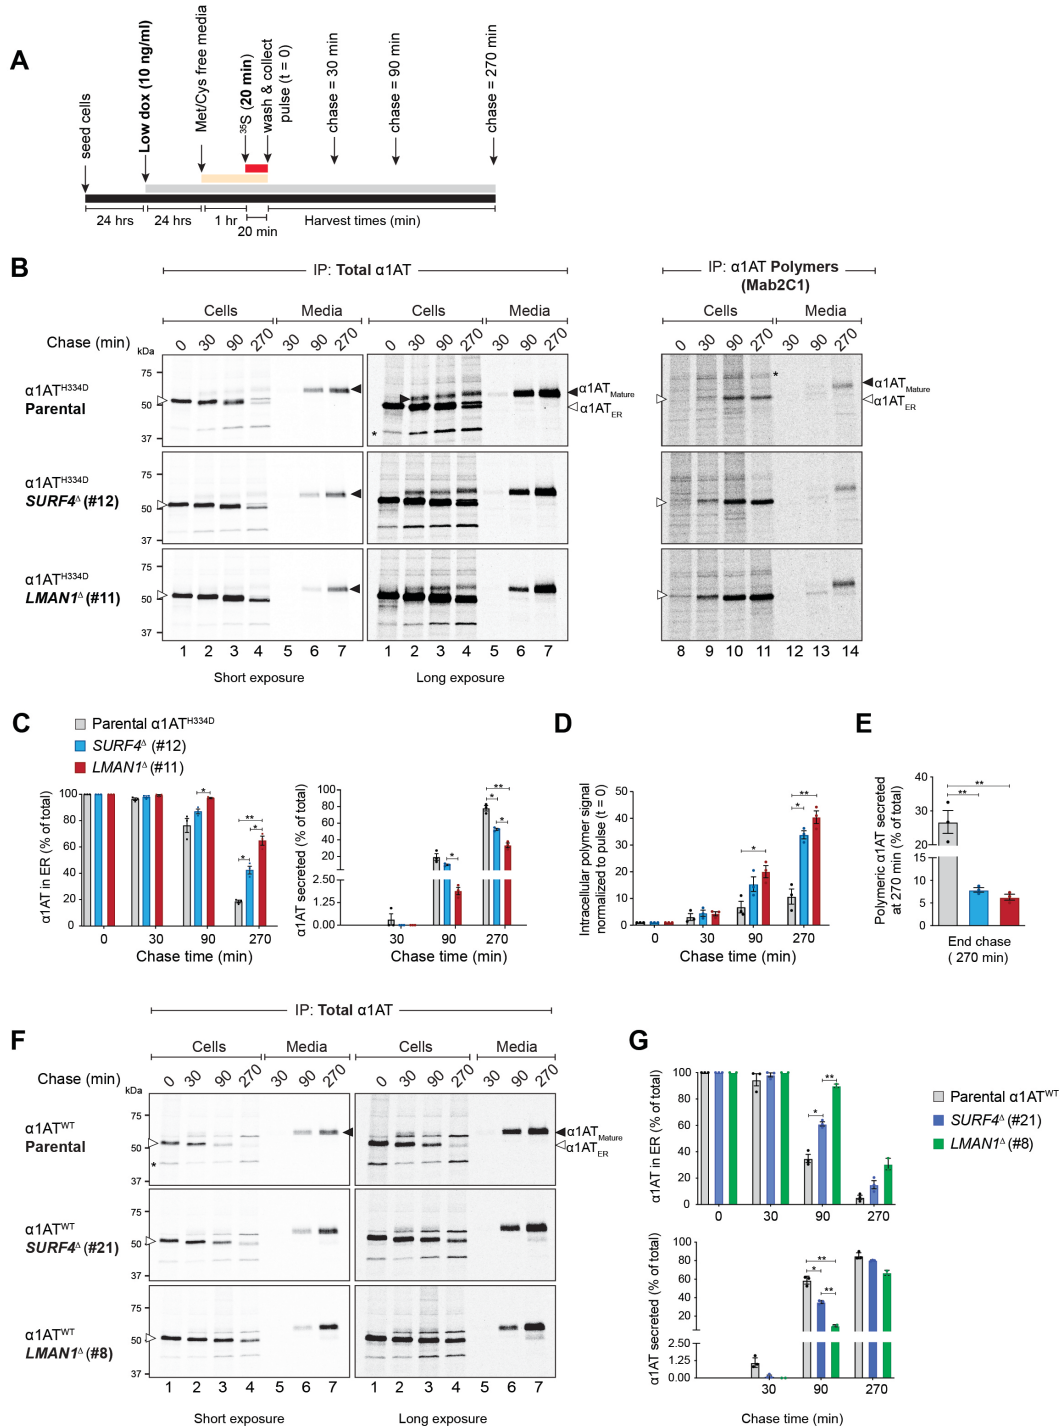

**Fig. 5. Altered intracellular trafficking of  $\alpha$ 1-antitrypsin in *SURF4* and *LMAN1* disrupted cells.** (A) Schema of the experimental design. Note the induction of  $\alpha$ 1AT expression with low concentration (10 ng/ml) of doxycycline (dox),  $^{35}$ S-methionine/cysteine (Met/Cys) pulse labelling (20 min) and chase times (30-270 min). (B) Short and long exposures of autoradiographs of SDS-PAGE gels load with labelled  $\alpha$ 1AT immunoprecipitated with a polyclonal antibody reactive with all forms of  $\alpha$ 1AT (left panels) or Mab2C1, selective for  $\alpha$ 1AT polymers (right panel) from lysates of parental CHO-K1 Tet-on- $\alpha$ 1AT<sup>H334D</sup> cells and their *SURF4* $\Delta$  and *LMAN1* $\Delta$  derivatives ('Cells') or the culture supernatant ('Media'). White arrowheads indicate the ER-associated form ( $\alpha$ 1AT<sub>ER</sub>) and black arrowheads the mature-glycosylated form ( $\alpha$ 1AT<sub>Mature</sub>). Asterisks (\*)

## Trafficking of polymeric alpha1-antitrypsin

represent unspecific bands. **(C)** Percentage of  $\alpha 1\text{AT}^{\text{H334D}}$  retained in the ER [ $(\alpha 1\text{AT}_{\text{ER}}$  in 'B'), left panel] or secreted into the media (right panel) of total protein ['cell' signal + 'media' signal] at each time point. **(D)** Intracellular polymer signal normalised to  $\alpha 1\text{AT}$  polymer signal at pulse end (lane 8). **(E)** Percentage of  $\alpha 1\text{AT}$  polymers present in the media of total protein at 270 min, calculated as in 'C'. **(F)** As in 'B', but using parental CHO-K1 Tet-on- $\alpha 1\text{AT}^{\text{WT}}$  cells and their  $\text{SURF4}^{\Delta}$  and  $\text{LMAN1}^{\Delta}$  derivatives. Total  $\alpha 1\text{AT}$  from cells and media was immunoprecipitated as in 'B'. **(G)** Percentage of  $\alpha 1\text{AT}^{\text{WT}}$  retained in the ER (upper panel) or secreted into the media (lower panel), calculated as in 'C'. Autoradiographs are representative of three independent experiments except for  $\text{LMAN1}^{\Delta}$  (clone #8,  $n = 2$ ). Quantitative plots show the mean  $\pm$  SEM. \*,  $P < 0.05$ ; and \*\*,  $P < 0.01$ . Two-way (in 'C', 'D' and 'G') or one-way ANOVA (in 'E') followed by Tukey's post-hoc multiple comparison test.

244

### 245 ***SURF4* disruption preferentially impairs intracellular trafficking of $\alpha 1\text{AT}$** 246 ***polymers***

247 SURF4 has been proposed as an ER cargo receptor that prioritises export of large,  
248 polymeric proteins (Saegusa et al., 2018; Yin et al., 2018). This, together with our  
249 observations noted above, suggested the possibility that SURF4 might also have a  
250 role in facilitating the exit of  $\alpha 1\text{AT}$  polymers from the ER. To address this question, we  
251 modified the pulse-chase procedure: synthesis of  $\alpha 1\text{AT}^{\text{H334D}}$  was increased by  
252 treating the cells with a higher concentration of doxycycline, thus shifting the  
253 equilibrium towards polymer formation. Crucially, the pulse and chase windows were  
254 prolonged to allow clearance of the fast-trafficking (labelled) mutant monomeric  
255 species and thereby focused the analysis on the remaining polymers (Fig. 6A).

256 The efficacy of these modifications is reflected in the appearance of a detectable pool  
257 of intracellular polymers at the end of the pulse and their persistence throughout the  
258 lengthy chase period, more conspicuously so in the  $\text{SURF4}^{\Delta}$  and  $\text{LMAN1}^{\Delta}$  cells (Fig.  
259 6B). In all three genotypes, labelled polymers also appeared in the culture media (Fig.  
260 6B) and these exhibited slower mobility on SDS-PAGE, compared to the cell-  
261 associated polymers. This observation is consistent with post-ER glycan  
262 modifications and indicates conventional trafficking through the secretory pathway.

263 In all three genotypes, intracellular polymer levels continued to increase after the  
264 pulse with levels peaking between 2.15-4.5 hrs chase (Fig. 6C, upper panel). Thus,  
265 considering this peak as a reference point by which to track the fate of ER-localised  
266 polymers, we found that  $\text{SURF4}^{\Delta}$  cells retained proportionally more polymers  
267 compared to parental or  $\text{LMAN1}^{\Delta}$  cells (Fig. 6C, lower panel). This finding correlated

## Trafficking of polymeric alpha1-antitrypsin

268 with higher degree of co-localisation of the polymers with the ER marker BiP in  
 269 *SURF4*<sup>Δ</sup> cells (Fig. 6D and Fig. S4B). Notably, the kinetics of the ratio of secreted  
 270 polymers to cell-associated polymers was significantly slower in *LMAN1*<sup>Δ</sup> and  
 271 *SURF4*<sup>Δ</sup> cells (Fig. 6E). Similar results were obtained with another independently  
 272 derived *SURF4*<sup>Δ</sup> clone (Fig. S4).  
 273 These findings implicate both LMAN1 and SURF4 in secretion of α1AT polymers in  
 274 CHO-K1 cells and suggest a preference of SURF4 for the transport of intracellular  
 275 α1AT polymers out of the ER compared to LMAN1.

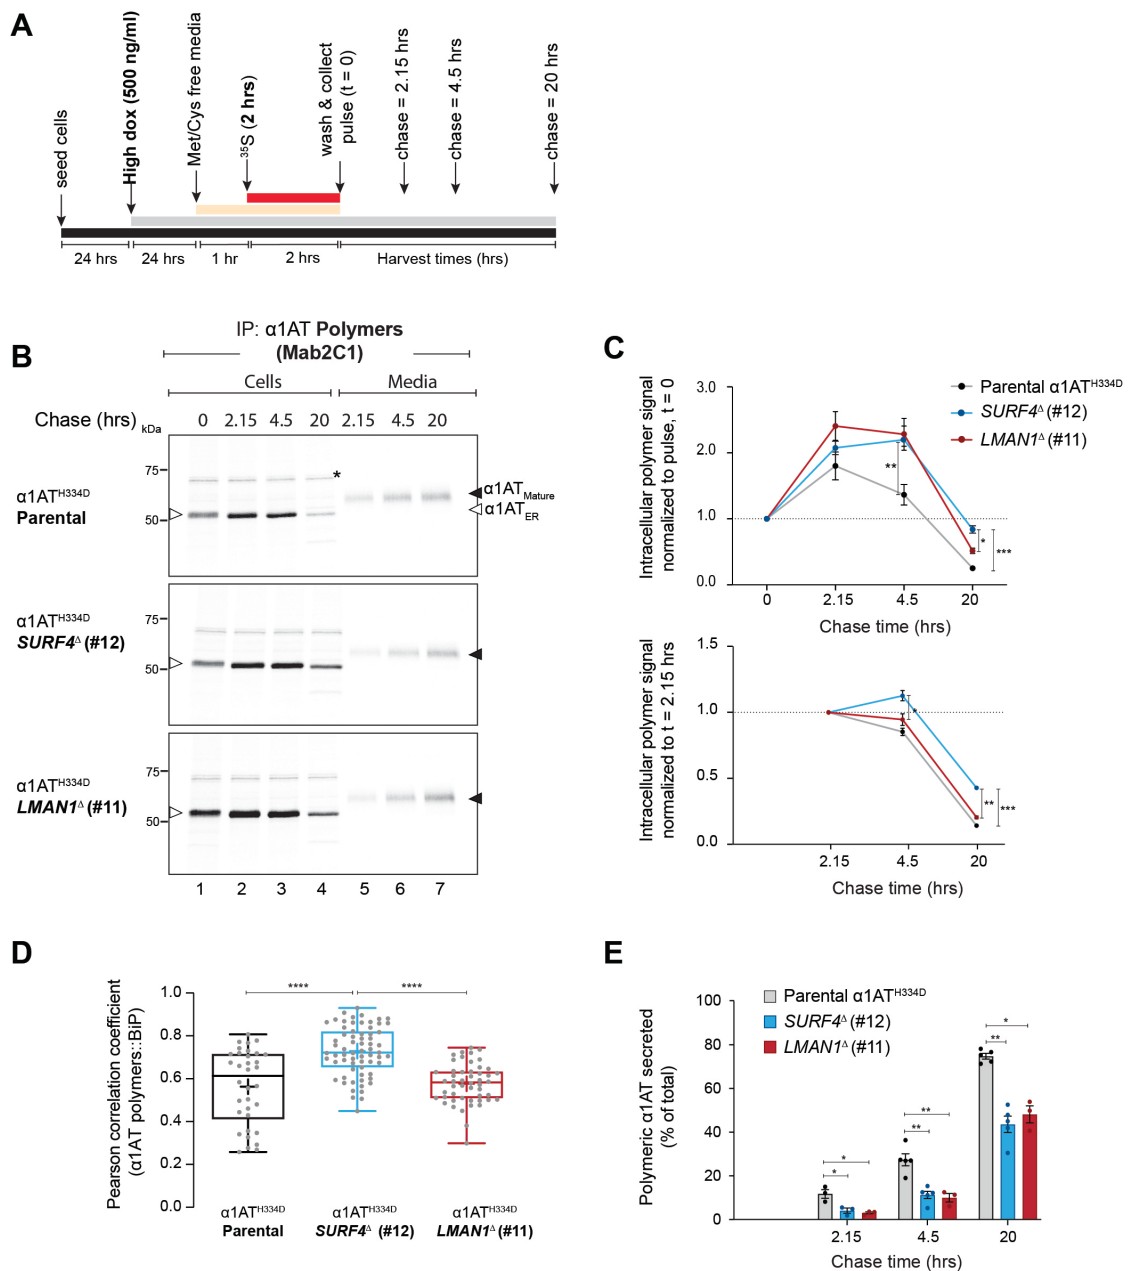

**Fig. 6. SURF4 and LMAN1 favour ER exit of α1-antitrypsin polymers. (A)** Schema of the experimental design. Note the induction of α1AT expression with a high



## Trafficking of polymeric alpha1-antitrypsin

concentration (500 ng/ml) of doxycycline (dox) and the lengthy  $^{35}\text{S}$ -Met/Cys pulse labelling period (2 hrs) and chase times (2.15 - 20 hrs). **(B)** Autoradiographs of SDS-PAGE gels loaded with labelled  $\alpha 1\text{AT}$  immunoprecipitated with polymer-selective Mab2C1 from lysates of parental CHO-K1 Tet-on- $\alpha 1\text{AT}^{\text{H334D}}$  cells and their *SURF4* $^{\Delta}$  and *LMAN1* $^{\Delta}$  derivatives ('Cells') or the culture supernatant ('Media'). White arrowheads indicate the ER-associated form ( $\alpha 1\text{AT}_{\text{ER}}$ ) and black arrowheads the mature-glycosylated form ( $\alpha 1\text{AT}_{\text{Mature}}$ ). Asterisks (\*) represent unspecific bands. **(C)** Plot of the cell-associated  $\alpha 1\text{AT}$  polymer signal at the indicated times, normalised to the signal at pulse end (lane 1; upper panel) or to the signal at 2.15 hrs (lane 2; bottom panel). **(D)** Pearson coefficient for the co-localisation of  $\alpha 1\text{AT}$  polymers (Mab2C1-stained) with the ER marker BiP in doxycycline-induced parental CHO-K1 Tet-on- $\alpha 1\text{AT}^{\text{H334D}}$  cells (n = 34) and their *SURF4* $^{\Delta}$  (n = 67) and *LMAN1* $^{\Delta}$  (n = 50) derivatives (Fig. S4B). **(E)** Percentage of  $\alpha 1\text{AT}$  polymers present in the media of total protein ['cell' signal + 'media' signal] at each time point in 'B'. Quantitative plots show the mean  $\pm$  SEM (n = 3-5). \*, P < 0.05; \*\*, P < 0.01; \*\*\*, P < 0.001; and \*\*\*\*, P < 0.0001. Two-way (in 'C' and 'E') or one-way ANOVA (in 'D') followed by Tukey's post-hoc multiple comparison test

276

### 277 ***SURF4 interacts with $\alpha 1\text{AT}$ in CHO-K1 cells***

278 The interaction of *LMAN1* and  $\alpha 1\text{AT}$  has been previously explored (Nyfeler et al.,  
279 2008). To assess possible physical interactions of *SURF4* and  $\alpha 1\text{AT}$ , cells expressing  
280  $\alpha 1\text{AT}^{\text{H334D}}$  or  $\alpha 1\text{AT}^{\text{WT}}$  were transfected with FLAG-tagged *SURF4* and subjected to  
281 crosslinked. FLAG-tagged *SURF4* was selectively recovered by anti-FLAG  
282 immunoprecipitation, accompanied by either  $\alpha 1\text{AT}^{\text{WT}}$  or  $\alpha 1\text{AT}^{\text{H334D}}$  (Fig. 7A,B).  
283 Transfection with a 7xHis-tagged *SURF4* provided an opportunity to recover *SURF4*-  
284  $\alpha 1\text{AT}$  complexes under denaturing conditions, which also allowed more stringent  
285 wash steps. Nickel affinity pulldowns indicated that both  $\alpha 1\text{AT}^{\text{WT}}$  and  $\alpha 1\text{AT}^{\text{H334D}}$  were  
286 recovered in complex with 7xHis-*SURF4* (Fig. 7C,D). Their recovery under denaturing  
287 conditions is consistent with a proximal interaction between the two species, though  
288 bridging by a third factor cannot be excluded.

289 The evidence provided here for an interaction between *SURF4* and  $\alpha 1\text{AT}$  is in  
290 keeping with *SURF4*'s functional role in trafficking of both polymeric and monomeric  
291 forms of  $\alpha 1\text{AT}$ .

## Trafficking of polymeric alpha1-antitrypsin

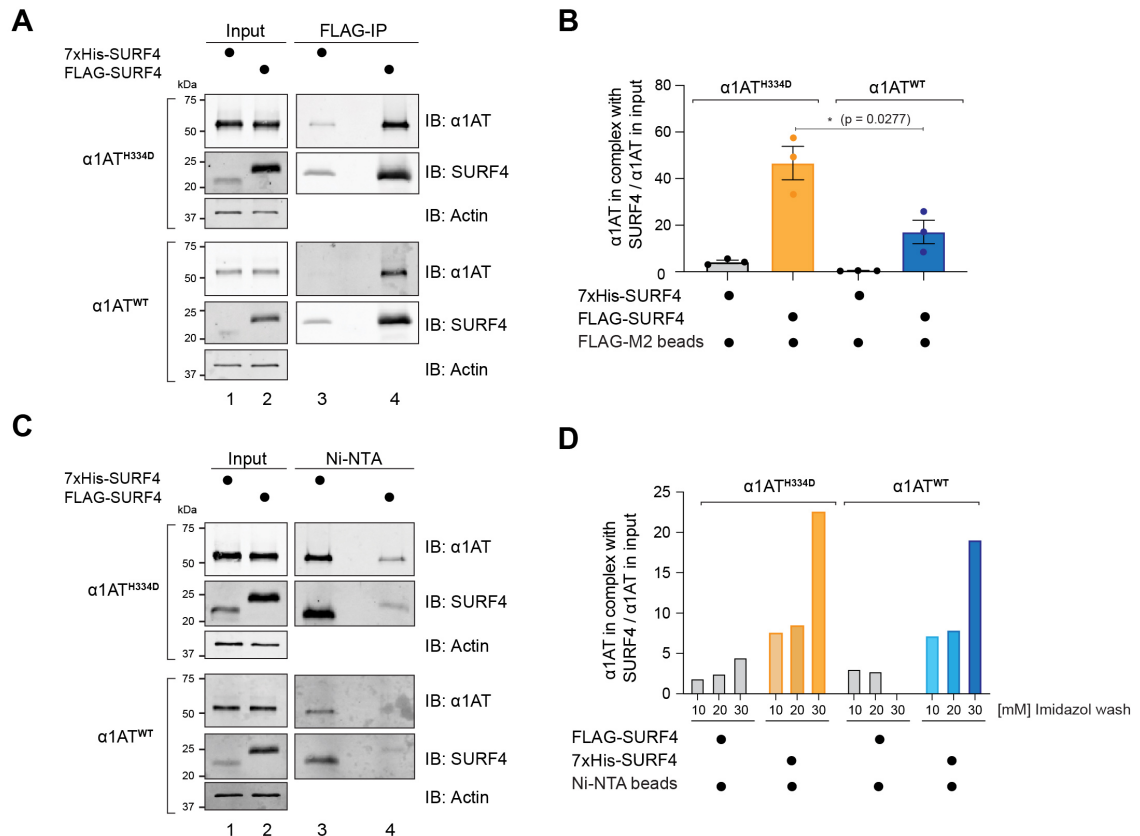

**Fig. 7. SURF4 interacts with  $\alpha$ 1-antitrypsin.** (A) Representative immunoblots of  $\alpha$ 1AT recovered in complex with FLAG-SURF4 (FLAG-IP) from CHO-K1 Tet-on cells expressing  $\alpha$ 1AT<sup>WT</sup> or  $\alpha$ 1AT<sup>H334D</sup> transfected with a FLAG-tagged or 7xHis-tagged (as control) SURF4 plasmids and subjected to crosslinking. (B) Ratio of the signal from the  $\alpha$ 1AT recovered in complex with FLAG-SURF4 to the  $\alpha$ 1AT signal in the 'input'. Shown is mean  $\pm$  SEM from three independent experiments as in 'A' (Student's t test). (C) As in 'A', but performing Ni-NTA affinity pulldowns under denaturing conditions on the same lysates used in 'A'. An imidazole gradient from 10-30 mM in the wash buffer was used across three experiments. This SDS-PAGE gel represents samples washed with 30 mM imidazole. Cells transfected with a FLAG-tagged SURF4 reported on the background in this assay. (D) Ratio of the signal from the  $\alpha$ 1AT recovered in complex with 7xHis-tagged SURF4 to the  $\alpha$ 1AT signal in the 'input' from three different experiments performed as in 'C' in buffers with the indicated concentration of imidazole.

292

293

## 294 Discussion

295 By interfering with secretion, intracellular polymerisation of mutant  $\alpha$ 1AT limits its  
 296 plasma concentration and contributes to the loss-of-function features of  $\alpha$ 1AT  
 297 deficiency. Simultaneously, polymer retention contributes to gain-of-function features  
 298 such as liver cirrhosis, whilst extracellular polymers appear to play a pro-inflammatory

## Trafficking of polymeric alpha1-antitrypsin

299 role in the lung (Lomas and Mahadeva, 2002) and elsewhere (Gross et al., 2009;  
300 Morris et al., 2011). Here, an unbiased genome-wide screen identified modifiers of  
301 intracellular levels of  $\alpha$ 1AT polymers, uncovering a previously under-appreciated role  
302 for cargo receptors in their active export from the ER and ultimately secretion of a  
303 fraction of the intracellular pool.

304 The strongest coherent signature to emerge from our screen was factors involved in  
305 cargo exit from the ER. These included LMAN1, a transmembrane cargo receptor  
306 known to have a role in the ER export of wild-type  $\alpha$ 1AT (Nyfeler et al., 2008; Zhang  
307 et al., 2011), validating the experimental approach. The screen also implicated  
308 SURF4 in affecting the intracellular levels of  $\alpha$ 1AT polymers. SURF4, the human  
309 orthologue of the yeast cargo receptor Erv29p (Belden and Barlowe, 2001), has been  
310 shown to be a versatile multi-spanning cargo receptor that facilitates export of large  
311 proteins such as the 550-kDa apolipoprotein B (Saegusa et al., 2018), small proteins  
312 such as the 75-kDa PCSK9 (Emmer et al., 2018), and soluble cargos that tend to  
313 aggregate within the ER (Yin et al., 2018). SURF4 has not been previously-  
314 recognised to have a role in the trafficking of  $\alpha$ 1AT, but it has been reported to form  
315 multiprotein complexes with LMAN1, along with other components of the ER exit  
316 complex (Mitrovic et al., 2008). Therefore, we focused our attention on the  
317 mechanisms by which loss of these cargo receptors altered the intracellular fate of  
318  $\alpha$ 1AT. These studies were carried out in genetically malleable CHO-K1 cells that  
319 recapitulate both ER morphology changes observed in hepatocytes of  $\alpha$ 1AT-deficient  
320 patients (Ordonez et al., 2013) and the impairment of intracellular protein mobility  
321 observed in induced pluripotent stem cell-derived  $\alpha$ 1AT deficiency hepatocytes  
322 (Segeritz et al., 2018).

323 Disruption of either *LMAN1* or *SURF4* delayed trafficking of both polymerogenic  
324  $\alpha$ 1AT<sup>H334D</sup> and  $\alpha$ 1AT<sup>WT</sup> out of the ER in this CHO-K1 system. As polymerisation is a  
325 concentration-dependent process (Lomas et al., 1993), impaired ER egress of mutant  
326  $\alpha$ 1AT monomers could account for all the increase in intracellular polymer signal  
327 observed in the *LMAN1*<sup>Δ</sup> and *SURF4*<sup>Δ</sup> cells. This finding nonetheless emphasises the  
328 fact that variation in the efficiency of monomer trafficking out of the ER could  
329 contribute to the clinical heterogeneity in polymer-induced liver disease (Wu et al.,  
330 1994).

## Trafficking of polymeric alpha1-antitrypsin

331 Less anticipated were findings pointing to a role for LMAN1 and SURF4 in the egress  
332 of polymers out of the ER and, ultimately, in their secretion from cells. This insight  
333 was gleaned from cells expressing high levels of mutant  $\alpha 1\text{AT}^{\text{H334D}}$ , conditions  
334 predicted to shift the equilibrium in the ER towards polymerisation. Introducing a  
335 delay in the pulse-chase experiment that favoured clearance of residual fast-  
336 trafficking labelled monomers, focused the analysis on the fate of polymers. *LMAN1*<sup>Δ</sup>  
337 and even more so *SURF4*<sup>Δ</sup> cells retained relatively more polymers and secreted  
338 relatively fewer polymers than parental cells. Co-localisation of the excess polymers  
339 with the ER marker BiP, was particularly conspicuous in the *SURF4*<sup>Δ</sup> cells, supporting  
340 the idea that SURF4 may have an important role in clearing the ER of  $\alpha 1\text{AT}$  polymers  
341 and possibly other large cargos, as suggested previously ([Saegusa et al., 2018](#)).

342 Co-immunoprecipitation experiments hinted at direct contact, or at least close  
343 proximity between SURF4 and  $\alpha 1\text{AT}$ . This was observed despite the absence from  
344  $\alpha 1\text{AT}$  of an N-terminal motif previously reported to promote cargo binding to SURF4  
345 ([Yin et al., 2018](#)) but also absent from other putative SURF4 cargos (e.g., PCSK9 and  
346 apolipoprotein B). Thus, at present, the basis for SURF4's ability to select monomeric  
347 and polymeric  $\alpha 1\text{AT}$  for export from the ER remains unknown.

348 The mobility of  $\alpha 1\text{AT}$  during SDS-PAGE suggests that polymeric  $\alpha 1\text{AT}$  found in the  
349 culture supernatant had undergone post-ER glycan modifications. This finding,  
350 together with the genetic evidence of a role for ER cargo receptors in its itinerary  
351 suggests that at least a fraction of extracellular polymers found their way through the  
352 conventional secretory pathway. The existence of pathway(s) by which misfolded ER  
353 proteins traffic out of the compartment, ultimately to be degraded in the lysosome  
354 ([Fregno et al., 2018](#)), raises the possibility that LMAN1 or SURF4 also restrain  
355 intracellular polymer levels by promoting a trafficking event that contributes to their  
356 intracellular degradation. These issues remain unsettled even in our CHO-K1 model.  
357 Nonetheless, the role of ER cargo receptors in the itinerary of  $\alpha 1\text{AT}$  monomers and  
358 polymers highlighted in this study conjures the possibility of mechanism-based  
359 interventions to alter the balance of polymers retained in cells, degraded  
360 intracellularly or secreted and could represent new therapeutic targets for the  
361 underlying lung disease.

362

## 363 **Acknowledgments**

364 We thank the CIMR flow cytometry (Reiner Schulte, Chiara Cossetti and Gabriela  
365 Grondys-Kotarba) and microscopy teams (Matthew Gratian and Mark Bowen) for  
366 technical support, Marcella Ma and Brian Lam (CRUK) for assistance with NGS and  
367 our lab members, especially Steffen Preissler (CIMR) for critical comments and  
368 advice.

## 369 **Author's contributions**

370 **A.O.** conceived, initiated, and led the project, designed and conducted the  
371 experiments, analysed and interpreted the data, prepared figures and tables and  
372 wrote the first draft of the manuscript. **H.P.H.** designed the CHO CRISPR/Cas9 library  
373 and contributed experimentally with the lentiviral library, in data analysis and reviewed  
374 the manuscript. **S.J.M.** contributed to discussion and revision of the manuscript. **D.R.**  
375 conceived and oversaw the project, interpreted the data, and co-wrote the  
376 manuscript. All authors read and approved the final manuscript.

## 377 **Conflict of interest**

378 No conflict to disclose.

## 379 **Financial support statement**

380 Funded in whole by a research grant from Wellcome (200848/Z/16/Z)

381

382

## 383 **Material and methods**

384 Standard molecular cloning methods were used to create the plasmids DNAs listed in  
385 the [Table S2](#). Single guides RNAs (sgRNAs) and oligonucleotides are listed in [Table](#)  
386 [S3](#). Antibodies, reagents and software are listed in [Table S4](#).

## 387 **Cell culture**

388 CHO-K1 cells expressing human  $\alpha 1AT^{WT}$  or the polymerogenic  $\alpha 1AT^{H334D}$  mutant  
389 under a tetracycline inducible promoter ([Ordonez et al., 2013](#)) were cultured in DMEM  
390 cell media (Sigma) supplemented with 10% Tet-free serum (Pan-Biotech), 1x  
391 Penicillin-Streptomycin (Sigma), 1x MEM-non-essential-amino-acids (Sigma), 2 mM

## Trafficking of polymeric alpha1-antitrypsin

392 L-glutamine (Sigma), 200 µg/mL G418 and 500 µg/mL of Hygromycin B (Invitrogen).  
393 Depending on the experiment, α1AT expression was induced with 10 ng/ml ('low dox')  
394 or 500 ng/ml ('high dox') doxycycline for 24 hrs. Although not relevant for these  
395 experiments, the open reading frame of *Cricetulus griseus DDIT3* locus was replaced  
396 by GFP (*CHOP::GFP* reporter) in the parental CHO-K1 Tet-on cells. For the  
397 CRISPR/Cas9 screen we stably introduced the Cas9 nuclease into CHO-K1 Tet-  
398 on\_α1AT<sup>H334D</sup> cells via lentiviral transduction (UK1714, see [Table S2](#) and [Table S3](#)).  
399 Cas9 activity in derivative cell lines was confirmed by targeting the *CHOP::GFP*  
400 reporter with a EGFP-targeting sgRNA (UK1717) followed by induction of ER stress.

401 CHO-K1 S21 cells bearing *CHOP::GFP* and *XBP1s::Turquoise* reporters ([Sekine et](#)  
402 [al., 2016](#)) were maintained in Nutrient Mixture F12 (Sigma) supplemented with 10%  
403 serum (FetalClone II, ThermoScientific), 1× Penicillin-Streptomycin and 2 mM L-  
404 glutamine. HEK293T cells (ATCC CRL-3216) were cultured in DMEM supplemented  
405 as above. All cells were grown at 37°C and 5% CO<sub>2</sub>.

### 406 **Lentivirus production**

407 Lentiviral particles were produced by transfecting HEK293T cells with the library  
408 plasmids (UK2561, UK2321 and UK2378) together with the packaging plasmids  
409 psPAX2 (UK1701) and pMD2.G (UK1700) at a 10:7.5:5 ratio using TransIT-293  
410 reagent (Mirus). The supernatant containing the viral particles was collected 48 hrs  
411 after transfection, filtered through a 0.45 µm filter, and directly used to infect CHO-K1  
412 cells seeded in 6-well plates for viral titration.

### 413 **Intracellular polymer staining, FACS and flow cytometry**

414 Cells were washed twice with PBS, collected in PBS containing 4 mM EDTA and 0.2%  
415 BSA and fixed in 1% formaldehyde for 10 min. Fixative was washed-out at 700× g for  
416 5 min and cells were permeabilised in blocking buffer [PBS containing 0.1% Triton X-  
417 100 and 10% FBS] for 20 min, incubated with the primary α1AT polymer-specific  
418 monoclonal antibody 2C1 (Mab2C1) ([Miranda et al., 2010](#)) for 30 min, washed three  
419 times in blocking solution, and then incubated with the secondary DyLight 633-  
420 labelled anti-mouse antibody for 20 min. Cells were washed, resuspended in PBS  
421 containing 2 mM EDTA and 2% FBS, filtered and sorted on an Influx cell sorter (BD)  
422 or analysed by flow cytometry (20,000 cells/sample) using a LSRFortessa cell  
423 analyser (BD). In order to reduce cell clumping, a cell density of ~2×10<sup>6</sup> cells/ml was

## Trafficking of polymeric alpha1-antitrypsin

424 adjusted and all incubations were done with orbital agitation at room temperature or  
425 4°C, when required.  $\alpha$ 1AT polymers (Mab2C1 signal) were detected by excitation at  
426 640 nm and monitoring emission at 670/14 nm; blue fluorescent protein (BFP) by  
427 excitation at 405 nm and monitoring at 450/50 nm; *CHOP::GFP* by excitation at 488  
428 nm and monitoring at 530/30 nm; *XBP1s::Turquoise* by excitation at 405 nm and  
429 monitoring at 450/50 nm. Data were processed using FlowJo and statistical analysis  
430 using Prism8 (GraphPad).

431 The sensitivity to UPR induction in CHO-K1 S21 cells bearing *CHOP::GFP* and  
432 *XBP1s::Turquoise* reporters was analysed after transient transfection with 1  $\mu$ g  
433 sgRNA-mCherry-Cas9 encoding plasmids, targeting *SURF4*, *LMAN1* and *HSPA5*  
434 (BiP protein) (see Table S2). Each gene was targeted with two different sgRNA and  
435 four days after transfection cells were analysed by flow cytometry.

### 436 **Whole genome CRISPR screen**

437 High-throughput screen was carried out as previously described (Shalem et al., 2014)  
438 using a Chinese hamster knockout CRISPR/Cas9 library containing 125,030 sgRNAs  
439 targeting 20,680 genes (most with 6 guides per gene) as well as 1,239 non-targeting  
440 sgRNAs as a negative control cloned into the lentiviral sgRNA expression vector  
441 pKLV-U6gRNA(BbsI)-PGKpuro2ABFP as described (Harding et al., manuscript in  
442 preparation). Approximately  $2.1 \times 10^8$  CHO-K1 Tet-on\_ $\alpha$ 1AT<sup>H334D</sup>\_Cas9 cells were  
443 infected at a multiplicity of infection (MOI) of 0.3, to favour infection with a single viral  
444 particle/cell and selected with 8  $\mu$ g/ml puromycin for 7 days. Expression of  $\alpha$ 1AT was  
445 induced with 10 ng/ml doxycycline for 24 hrs. Afterwards, the cells were fixed and  
446 permeabilised for intracellular staining of  $\alpha$ 1AT polymers. Approximately  $6.6 \times 10^7$   
447 Mab2C1-stained fixed cells were subjected to FACS and collected in 3 bins according  
448 to their fluorescence intensity at 670 nm (Mab2C1): 'brightest' (~2% of total sorted),  
449 'medium-bright' (~4.5% of total), and 'dull' (~10% of total) as shown in Fig. 1B.  
450 Rounds of enrichment were carried on by extracting the genomic DNA of the  
451 'brightest'-binned fixed cells and recovering by PCR a 220bp fragment containing the  
452 sgRNA-bearing region (oligonucleotides 2182 and 1758). The amplicon was ligated  
453 into the parental lentiviral backbone (UK1789) to generate derivative enriched  
454 libraries (called Lib<sub>1</sub> and Lib<sub>2</sub>) that were used to perform two successive cycles of  
455 infection of  $\sim 2 \times 10^7$  parental CHO-K1 Tet-on\_ $\alpha$ 1AT<sup>H334D</sup>\_Cas9 cells. In each round an

## Trafficking of polymeric alpha1-antitrypsin

456 equal number of infected, untreated cells (no doxycycline) or uninfected, doxycycline-  
457 treated cells were passed without sorting as a control group.

458 Genomic DNA from fixed, enriched, and sorted populations as well as fixed, unsorted  
459 libraries was extracted from  $\sim 1-3 \times 10^6$  and  $\sim 3.6 \times 10^7$  cells respectively, by incubation  
460 in proteinase K solution [100 mM Tris-HCl pH 8.5, 5 mM EDTA, 200 mM NaCl, 0.25%  
461 SDS, 0.2 mg/ml Proteinase K] overnight at 50°C. To reverse formaldehyde crosslinks,  
462 samples were supplemented with 500 mM NaCl and incubated at 65°C for 16 hrs.  
463 Integrated sgRNA sequences were amplified by nested PCR and the adaptors for  
464 Illumina sequencing (HiSeq4000) were introduced at the final amplification round  
465 using oligonucleotides 1759-1769 (Table S3). Downstream analysis to obtain sgRNA  
466 read counts, gene rankings, and statistics were obtained using the MAGeCK  
467 computational software (Li et al., 2014). Gene ontology analyses were performed  
468 using Metascape software with default parameters (Zhou et al., 2019).

### 469 **Validation of candidate genes**

470 Two individual sgRNAs designed in the library targeting exon regions of *Cricetulus*  
471 *griseus* *LMAN1*, *SURF4* and *SEC23B* were cloned into the pSpCas9(BB)-2A-  
472 mCherry plasmid (UK1610) as previously reported (Ran et al., 2013). Cells were  
473 transfected with 1  $\mu$ g of sgRNA/Cas9 plasmids (UK2501-UK2506) using Lipofectamine  
474 LTX (Thermofisher). Forty-eight hours after transfection, mCherry-positive cells were  
475 individually sorted into 96-well plates using a MoFlo Cell Sorter (Beckman Coulter).  
476 The presence of frameshift-causing insertion/deletions in both alleles of the obtained  
477 clones was achieved by capillary electrophoresis on a 3730xl DNA analyser (Applied  
478 Biosystems) and amplifying the targeted region by PCR using a gene-specific 5' 6-  
479 carboxyfluorescein (FAM)-labelled oligonucleotides (Hjelm et al., 2010). The  
480 knockouts were confirmed by Sanger sequencing and immunoblotting. Genomic  
481 information of the clones used in this study is provided in Table S5.

### 482 **Mammalian cell lysates, sandwich ELISA, and immunoblotting**

483 Cells were lysed in Nonidet lysis buffer [150 mM NaCl, 50 mM Tris-HCl pH 7.5, 1%  
484 Nonidet P-40] supplemented with protease inhibitor mixture (Roche) for 20 min on  
485 ice. To quantify polymer and total levels of intracellular  $\alpha$ 1AT, cell lysates were  
486 analysed by sandwich ELISA using the polymer-specific Mab2C1 and a monoclonal  
487 antibody that recognises all  $\alpha$ 1AT conformers (Mab3C11) (Tan et al., 2015)



## Trafficking of polymeric alpha1-antitrypsin

488 respectively. Briefly, high binding surface COSTAR 96-well plates (Corning) were  
489 coated overnight with purified rabbit polyclonal antibody against total  $\alpha$ 1AT at 2  $\mu$ g/ml  
490 in PBS. After washing with PBS containing 0.9% NaCl and 0.05% Tween-20, the  
491 plates were blocked for 1 hr in blocking buffer (PBS containing 0.25% BSA and  
492 0.05% Tween-20). Samples and standard curves were diluted in blocking buffer and  
493 incubated for 2 hrs with the primary antibodies, Mab2C1 or Mab3C11. Anti-mouse  
494 IgG horseradish peroxidase-labelled antibody was used as a secondary antibody and  
495 incubated for 1 hr. The reaction was developed with TMB liquid substrate for 10 min  
496 in the dark, and the reaction was stopped with 1 M H<sub>2</sub>SO<sub>4</sub>. Absorbance was read at  
497 450 nm on a microplate reader. For immunoblots, SDS sample buffer was added to  
498 the lysates and proteins were denatured by heating at 70°C for 10 min and separated  
499 on 10-12% SDS-PAGE gels and transferred onto PVDF membranes prior to  
500 immunodetection. Cyclophilin B and actin were detected as loading controls. To  
501 detect the multi-pass transmembrane protein SURF4, samples were incubated at  
502 37°C for 15 min. Native-PAGE (4.5% stacking gel and a 7.5% separation gel) was  
503 performed to separate and identify  $\alpha$ 1AT monomers and polymers. Membranes were  
504 scanned using an Odyssey near infrared imager (LI-COR) and signals were  
505 quantified with ImageJ software.

### 506 **[<sup>35</sup>S] metabolic labelling and immunoprecipitation**

507 Cells were starved in Methionine/Cysteine-free DMEM for 1 hr, pulsed with 100  
508  $\mu$ Ci/well [<sup>35</sup>S]methionine/cysteine (Expre<sup>35</sup>S Protein Labelling Mix) and harvested or  
509 chased in DMEM containing 200 mM methionine and cysteine and 10% dialysed  
510 FBS. After the chase, culture media were collected and cells harvested on ice in  
511 Nonidet lysis buffer supplemented with protease inhibitor mixture (Roche). Culture  
512 media and cell lysates were precleared and  $\alpha$ 1AT was immunoprecipitated with a  
513  $\alpha$ 1AT polyclonal antibody (total) or the Mab2C1 (polymer-specific) by splitting each  
514 sample in two equal parts. Radiolabelled proteins were recovered in 2 $\times$ SDS-PAGE  
515 loading buffer, separated on 10% SDS-PAGE gels, detected by autoradiography with  
516 a Typhoon biomolecular imager (GE Healthcare) and quantified using ImageJ.

### 517 ***Cross-linking and co-immunoprecipitation***

518 CHO-K1 Tet-on cells expressing  $\alpha$ 1AT<sup>WT</sup> or  $\alpha$ 1AT<sup>H334D</sup> were grown in 10-cm dishes  
519 and transfected with either a 7 $\times$ His- or FLAG-tagged SURF4 (UK2622 and UK2549)  
520 for 6 hrs. Afterwards, medium was exchanged against medium supplemented with

## Trafficking of polymeric alpha1-antitrypsin

521 500 ng/ml doxycycline and cells were further incubated for 20 hrs. Cross-linking was  
522 performed following a previously-published protocol (Zlatic et al., 2010) with  
523 modifications. Cells were washed twice with PBS/Ca/Mg solution (PBS containing 0.1  
524 mM CaCl<sub>2</sub> and 1 mM MgCl<sub>2</sub>) and incubated for 2 hrs on ice with 1 mM  
525 dithiobis(succinimidyl propionate) (DSP, reversible crosslinker) diluted in pre-warmed  
526 (37°C) PBS/Ca/Mg solution. The DSP-containing solution was removed and the  
527 residual DSP was quenched for 15 min with PBS/Ca/Mg solution supplemented with  
528 20 mM Tris-HCl pH 7.4. Cells were washed with PBS/Ca/Mg and lysed in Nonidet  
529 lysis buffer. A post-nuclear supernatant was prepared by centrifugation at  
530 20,000× *g* at 4°C for 15 min, and then cleared again at 20,000× *g* for 5 min. For  
531 immunoprecipitation of FLAG-SURF4, cell lysates (750 µg total protein) were  
532 precleared with empty agarose beads and then incubated with anti-FLAG-M2 agarose  
533 affinity beads (Sigma) with rotation overnight at 4°C. Beads were washed four times  
534 with RIPA buffer [50 mM Tris-HCl pH 8, 150 mM NaCl, 1% triton X-100, 0.5% sodium  
535 deoxycholate, 0.1% SDS]. Bound proteins were eluted by addition of 2×SDS sample  
536 buffer (without DTT) and shaking at 37°C for 15 min to avoid aggregation of SURF4.  
537 Eluted proteins were recovered at 2,800× *g* for 5 min, 50 mM DTT was added and  
538 samples were further incubated at 37°C for 10 min. For pulldowns of 7xHis-SURF4,  
539 cell lysates were incubated in denaturing binding buffer (8 M Urea, 10 mM imidazole)  
540 containing protease inhibitors. Cell lysates were loaded onto Ni-NTA agarose beads  
541 (Qiagen) and incubated with orbital rotation overnight at RT. The beads were washed  
542 in denaturing washing buffer containing 150 mM NaCl, 50 mM Tris, 8 M Urea. Over  
543 the three independent experiments different concentrations of imidazole were used  
544 (10, 20 and 30 mM, respectively) to successively increase stringency of the wash  
545 step. Beads were then suspended in elution buffer [8 M Urea, 2% SDS, 50 mM DTT,  
546 4 mM EDTA]. Equal volumes of the samples were loaded on 12% SDS-PAGE gels.  
547 Samples of the normalised cell lysates (15 µg) were loaded as 'input' controls and  
548 bands were quantitated using ImageJ.

### 549 ***Confocal microscopy***

550 Cells were seeded on coverslips pretreated with 0.1 mg/ml poly-L-lysine (Sigma) in  
551 12-well plates and then fixed with 4% paraformaldehyde for 30 min, followed by  
552 permeabilisation with 0.1% Triton X-100 for 15 min. After 30 min blocking with PBS  
553 containing 10% BSA and 0.1% Triton X-100 the cells were co-stained with primary

## Trafficking of polymeric alpha1-antitrypsin

554 antibodies (Mab2C1 and anti-BiP) and the corresponding fluorescent secondary  
555 antibodies. Coverslips were mounted in FluorSave reagent (Calbiochem) containing  
556 2% 1,4-diazabicyclo-[2.2.2]octane (Sigma). Imaging was performed on a Zeiss 710  
557 confocal microscope using a 63x/1.4 oil immersion objective and diode, argon and  
558 HeNe lasers. The quantification of co-localisation between both fluorescence  
559 channels (Pearson correlation coefficient) was quantified using Volocity software,  
560 version 6.3 (PerkinElmer).

### 561 **Statistics**

562 Data groups were analysed as described in the figure legends using GraphPad  
563 Prism8 software. Differences between groups were considered statistically significant  
564 if  $P < 0.05$  (\*,  $P < 0.05$ ; \*\*,  $P < 0.01$ ; and \*\*\*,  $P < 0.001$ ). All error bars represent mean  
565  $\pm$  SEM.

566

567

### 568 **Listing of supplemental materials**

569 [Fig. S1](#) shows the concentration-dependence of the response of CHO-K1 Tet-on cells  
570 to doxycycline and bafilomycinA1. [Fig. S2](#) shows the quality control data analysis of  
571 the CRISPR/Cas9 screen performed by MAGeCK. [Fig. S3](#) (related to Fig. 5) shows  
572 the altered intracellular trafficking of  $\alpha$ 1AT in an additional *SURF4*<sup>Δ</sup> clone. [Fig. S4](#)  
573 (related to Fig. 6) shows that SURF4 favours ER exit of  $\alpha$ 1AT polymers in an  
574 additional *SURF4*<sup>Δ</sup> clone and contains microscopic images showing co-localisation of  
575  $\alpha$ 1AT polymers with the ER marker BiP. [Table S1](#) contains the complete ranked list of  
576 genes enriched in 'brightest' cells generated by MAGeCK. [Table S2](#) indicates the  
577 recombinant plasmid DNAs used in this study. [Table S3](#) indicates the list of sgRNAs  
578 and oligonucleotides. [Table S4](#) indicates the list of antibodies, reagents and software.  
579 [Table S5](#) indicated the clones generated in this study.

580

581 **References**

- 582 Belden, W.J., and C. Barlowe. 2001. Role of Erv29p in collecting soluble secretory proteins  
583 into ER-derived transport vesicles. *Science*. 294:1528-1531.
- 584 Carrell, R.W., and D.A. Lomas. 2002. Alpha1-antitrypsin deficiency--a model for  
585 conformational diseases. *The New England journal of medicine*. 346:45-53.
- 586 Citterio, C., A. Vichi, G. Pacheco-Rodriguez, A.M. Aponte, J. Moss, and M. Vaughan. 2008.  
587 Unfolded protein response and cell death after depletion of brefeldin A-inhibited  
588 guanine nucleotide-exchange protein GBF1. *Proceedings of the National Academy of  
589 Sciences of the United States of America*. 105:2877-2882.
- 590 D'Arcangelo, J.G., K.R. Stahmer, and E.A. Miller. 2013. Vesicle-mediated export from the ER:  
591 COPII coat function and regulation. *Biochimica et biophysica acta*. 1833:2464-2472.
- 592 Emmer, B.T., G.G. Hesketh, E. Kotnik, V.T. Tang, P.J. Lascuna, J. Xiang, A.C. Gingras, X.W.  
593 Chen, and D. Ginsburg. 2018. The cargo receptor SURF4 promotes the efficient  
594 cellular secretion of PCSK9. *eLife*. 7.
- 595 Eriksson, S., J. Carlson, and R. Velez. 1986. Risk of cirrhosis and primary liver cancer in  
596 alpha 1-antitrypsin deficiency. *The New England journal of medicine*. 314:736-739.
- 597 Fra, A., F. Cosmi, A. Ordonez, R. Berardelli, J. Perez, N.A. Guadagno, L. Corda, S.J.  
598 Marciniak, D.A. Lomas, and E. Miranda. 2016. Polymers of Z alpha1-antitrypsin are  
599 secreted in cell models of disease. *The European respiratory journal*. 47:1005-1009.
- 600 Fregno, I., E. Fasana, T.J. Bergmann, A. Raimondi, M. Loi, T. Solda, C. Galli, R. D'Antuono,  
601 D. Morone, A. Danieli, P. Paganetti, E. van Anken, and M. Molinari. 2018. ER-to-  
602 lysosome-associated degradation of proteasome-resistant ATZ polymers occurs via  
603 receptor-mediated vesicular transport. *The EMBO journal*. 37.
- 604 Gomez-Navarro, N., and E. Miller. 2016. Protein sorting at the ER-Golgi interface. *The  
605 Journal of cell biology*. 215:769-778.
- 606 Gooptu, B., J.A. Dickens, and D.A. Lomas. 2014. The molecular and cellular pathology of  
607 alpha(1)-antitrypsin deficiency. *Trends in molecular medicine*. 20:116-127.
- 608 Gooptu, B., and D.A. Lomas. 2008. Polymers and inflammation: disease mechanisms of the  
609 serpinopathies. *The Journal of experimental medicine*. 205:1529-1534.
- 610 Gross, B., M. Grebe, M. Wencker, J.K. Stoller, L.M. Bjursten, and S. Janciauskiene. 2009.  
611 New Findings in PiZZ alpha1-antitrypsin deficiency-related panniculitis. Demonstration  
612 of skin polymers and high dosing requirements of intravenous augmentation therapy.  
613 *Dermatology*. 218:370-375.
- 614 Hauri, H.P., F. Kappeler, H. Andersson, and C. Appenzeller. 2000. ERGIC-53 and traffic in  
615 the secretory pathway. *Journal of cell science*. 113 ( Pt 4):587-596.
- 616 Hjelm, L.N., E.L. Chin, M.R. Hegde, B.W. Coffee, and L.J. Bean. 2010. A simple method to  
617 confirm and size deletion, duplication, and insertion mutations detected by sequence  
618 analysis. *The Journal of molecular diagnostics : JMD*. 12:607-610.
- 619 Jensen, D., and R. Schekman. 2011. COPII-mediated vesicle formation at a glance. *Journal  
620 of cell science*. 124:1-4.

## Trafficking of polymeric alpha1-antitrypsin

- 621 Kroeger, H., E. Miranda, I. MacLeod, J. Perez, D.C. Crowther, S.J. Marciniak, and D.A.  
622 Lomas. 2009. Endoplasmic reticulum-associated degradation (ERAD) and autophagy  
623 cooperate to degrade polymerogenic mutant serpins. *The Journal of biological*  
624 *chemistry*. 284:22793-22802.
- 625 Li, W., H. Xu, T. Xiao, L. Cong, M.I. Love, F. Zhang, R.A. Irizarry, J.S. Liu, M. Brown, and  
626 X.S. Liu. 2014. MAGeCK enables robust identification of essential genes from  
627 genome-scale CRISPR/Cas9 knockout screens. *Genome biology*. 15:554.
- 628 Lomas, D.A., D.L. Evans, S.R. Stone, W.S. Chang, and R.W. Carrell. 1993. Effect of the Z  
629 mutation on the physical and inhibitory properties of alpha 1-antitrypsin. *Biochemistry*.  
630 32:500-508.
- 631 Lomas, D.A., and R. Mahadeva. 2002. Alpha1-antitrypsin polymerization and the  
632 serpinopathies: pathobiology and prospects for therapy. *The Journal of clinical*  
633 *investigation*. 110:1585-1590.
- 634 Mahadeva, R., C. Atkinson, Z. Li, S. Stewart, S. Janciauskiene, D.G. Kelley, J. Parmar, R.  
635 Pitman, S.D. Shapiro, and D.A. Lomas. 2005. Polymers of Z alpha1-antitrypsin co-  
636 localize with neutrophils in emphysematous alveoli and are chemotactic in vivo. *The*  
637 *American journal of pathology*. 166:377-386.
- 638 Miranda, E., J. Perez, U.I. Ekeowa, N. Hadzic, N. Kalsheker, B. Gooptu, B. Portmann, D.  
639 Belorgey, M. Hill, S. Chambers, J. Teckman, G.J. Alexander, S.J. Marciniak, and D.A.  
640 Lomas. 2010. A novel monoclonal antibody to characterize pathogenic polymers in  
641 liver disease associated with alpha1-antitrypsin deficiency. *Hepatology*. 52:1078-  
642 1088.
- 643 Mitrovic, S., H. Ben-Tekaya, E. Koegler, J. Gruenberg, and H.P. Hauri. 2008. The cargo  
644 receptors Surf4, endoplasmic reticulum-Golgi intermediate compartment (ERGIC)-53,  
645 and p25 are required to maintain the architecture of ERGIC and Golgi. *Molecular*  
646 *biology of the cell*. 19:1976-1990.
- 647 Morris, H., M.D. Morgan, A.M. Wood, S.W. Smith, U.I. Ekeowa, K. Herrmann, J.U. Holle, L.  
648 Guillevin, D.A. Lomas, J. Perez, C.D. Pusey, A.D. Salama, R. Stockley, S. Wieczorek,  
649 A.J. McKnight, A.P. Maxwell, E. Miranda, J. Williams, C.O. Savage, and L. Harper.  
650 2011. ANCA-associated vasculitis is linked to carriage of the Z allele of alpha(1)  
651 antitrypsin and its polymers. *Annals of the rheumatic diseases*. 70:1851-1856.
- 652 Morrison, H.M., J.A. Kramps, D. Burnett, and R.A. Stockley. 1987. Lung lavage fluid from  
653 patients with alpha 1-proteinase inhibitor deficiency or chronic obstructive bronchitis:  
654 anti-elastase function and cell profile. *Clinical science*. 72:373-381.
- 655 Mulgrew, A.T., C.C. Taggart, M.W. Lawless, C.M. Greene, M.L. Brantly, S.J. O'Neill, and N.G.  
656 McElvaney. 2004. Z alpha1-antitrypsin polymerizes in the lung and acts as a  
657 neutrophil chemoattractant. *Chest*. 125:1952-1957.
- 658 Nyfeler, B., V. Reiterer, M.W. Wendeler, E. Stefan, B. Zhang, S.W. Michnick, and H.P. Hauri.  
659 2008. Identification of ERGIC-53 as an intracellular transport receptor of alpha1-  
660 antitrypsin. *The Journal of cell biology*. 180:705-712.
- 661 Ordonez, A., E.L. Snapp, L. Tan, E. Miranda, S.J. Marciniak, and D.A. Lomas. 2013.  
662 Endoplasmic reticulum polymers impair luminal protein mobility and sensitize to  
663 cellular stress in alpha1-antitrypsin deficiency. *Hepatology*. 57:2049-2060.

## Trafficking of polymeric alpha1-antitrypsin

- 664 Ran, F.A., P.D. Hsu, J. Wright, V. Agarwala, D.A. Scott, and F. Zhang. 2013. Genome  
665 engineering using the CRISPR-Cas9 system. *Nature protocols*. 8:2281-2308.
- 666 Reeves, J.E., and M. Fried. 1995. The surf-4 gene encodes a novel 30 kDa integral  
667 membrane protein. *Molecular membrane biology*. 12:201-208.
- 668 Saegusa, K., M. Sato, N. Morooka, T. Hara, and K. Sato. 2018. SFT-4/Surf4 control ER  
669 export of soluble cargo proteins and participate in ER exit site organization. *The*  
670 *Journal of cell biology*. 217:2073-2085.
- 671 Segeritz, C.P., S.T. Rashid, M.C. de Brito, M.P. Serra, A. Ordonez, C.M. Morell, J.E.  
672 Kaserman, P. Madrigal, N.R.F. Hannan, L. Gatto, L. Tan, A.A. Wilson, K. Lilley, S.J.  
673 Marciniak, B. Gooptu, D.A. Lomas, and L. Vallier. 2018. hiPSC hepatocyte model  
674 demonstrates the role of unfolded protein response and inflammatory networks in  
675 alpha1-antitrypsin deficiency. *Journal of hepatology*. 69:851-860.
- 676 Sekine, Y., A. Zyryanova, A. Crespillo-Casado, N. Amin-Wetzel, H.P. Harding, and D. Ron.  
677 2016. Paradoxical Sensitivity to an Integrated Stress Response Blocking Mutation in  
678 Vanishing White Matter Cells. *PloS one*. 11:e0166278.
- 679 Shalem, O., N.E. Sanjana, E. Hartenian, X. Shi, D.A. Scott, T. Mikkelsen, D. Heckl, B.L.  
680 Ebert, D.E. Root, J.G. Doench, and F. Zhang. 2014. Genome-scale CRISPR-Cas9  
681 knockout screening in human cells. *Science*. 343:84-87.
- 682 Tan, L., J.A. Dickens, D.L. Demeo, E. Miranda, J. Perez, S.T. Rashid, J. Day, A. Ordonez,  
683 S.J. Marciniak, I. Haq, A.F. Barker, E.J. Campbell, E. Eden, N.G. McElvaney, S.I.  
684 Rennard, R.A. Sandhaus, J.M. Stocks, J.K. Stoller, C. Strange, G. Turino, F.N.  
685 Rouhani, M. Brantly, and D.A. Lomas. 2014. Circulating polymers in alpha1-antitrypsin  
686 deficiency. *The European respiratory journal*. 43:1501-1504.
- 687 Tan, L., J. Perez, M. Mela, E. Miranda, K.A. Burling, F.N. Rouhani, D.L. DeMeo, I. Haq, J.A.  
688 Irving, A. Ordonez, J.A. Dickens, M. Brantly, S.J. Marciniak, G.J. Alexander, B.  
689 Gooptu, and D.A. Lomas. 2015. Characterising the association of latency with  
690 alpha(1)-antitrypsin polymerisation using a novel monoclonal antibody. *The*  
691 *international journal of biochemistry & cell biology*. 58:81-91.
- 692 Walter, P., and D. Ron. 2011. The unfolded protein response: from stress pathway to  
693 homeostatic regulation. *Science*. 334:1081-1086.
- 694 Wu, Y., I. Whitman, E. Molmenti, K. Moore, P. Hippenmeyer, and D.H. Perlmutter. 1994. A  
695 lag in intracellular degradation of mutant alpha 1-antitrypsin correlates with the liver  
696 disease phenotype in homozygous PiZZ alpha 1-antitrypsin deficiency. *Proceedings*  
697 *of the National Academy of Sciences of the United States of America*. 91:9014-9018.
- 698 Yin, Y., M.R. Garcia, A.J. Novak, A.M. Saunders, R.S. Ank, A.S. Nam, and L.W. Fisher. 2018.  
699 Surf4 (Erv29p) binds amino-terminal tripeptide motifs of soluble cargo proteins with  
700 different affinities, enabling prioritization of their exit from the endoplasmic reticulum.  
701 *PLoS biology*. 16:e2005140.
- 702 Zhang, B., C. Zheng, M. Zhu, J. Tao, M.P. Vasievich, A. Baines, J. Kim, R. Schekman, R.J.  
703 Kaufman, and D. Ginsburg. 2011. Mice deficient in LMAN1 exhibit FV and FVIII  
704 deficiencies and liver accumulation of alpha1-antitrypsin. *Blood*. 118:3384-3391.

## Trafficking of polymeric alpha1-antitrypsin

705 Zhou, Y., B. Zhou, L. Pache, M. Chang, A.H. Khodabakhshi, O. Tanaseichuk, C. Benner, and  
706 S.K. Chanda. 2019. Metascape provides a biologist-oriented resource for the analysis  
707 of systems-level datasets. *Nature communications*. 10:1523.

708 Zlatic, S.A., P.V. Ryder, G. Salazar, and V. Faundez. 2010. Isolation of labile multi-protein  
709 complexes by in vivo controlled cellular cross-linking and immuno-magnetic affinity  
710 chromatography. *Journal of visualized experiments : JoVE*.

711

712

## Trafficking of polymeric alpha1-antitrypsin

### 713 Supplementary Figures

714

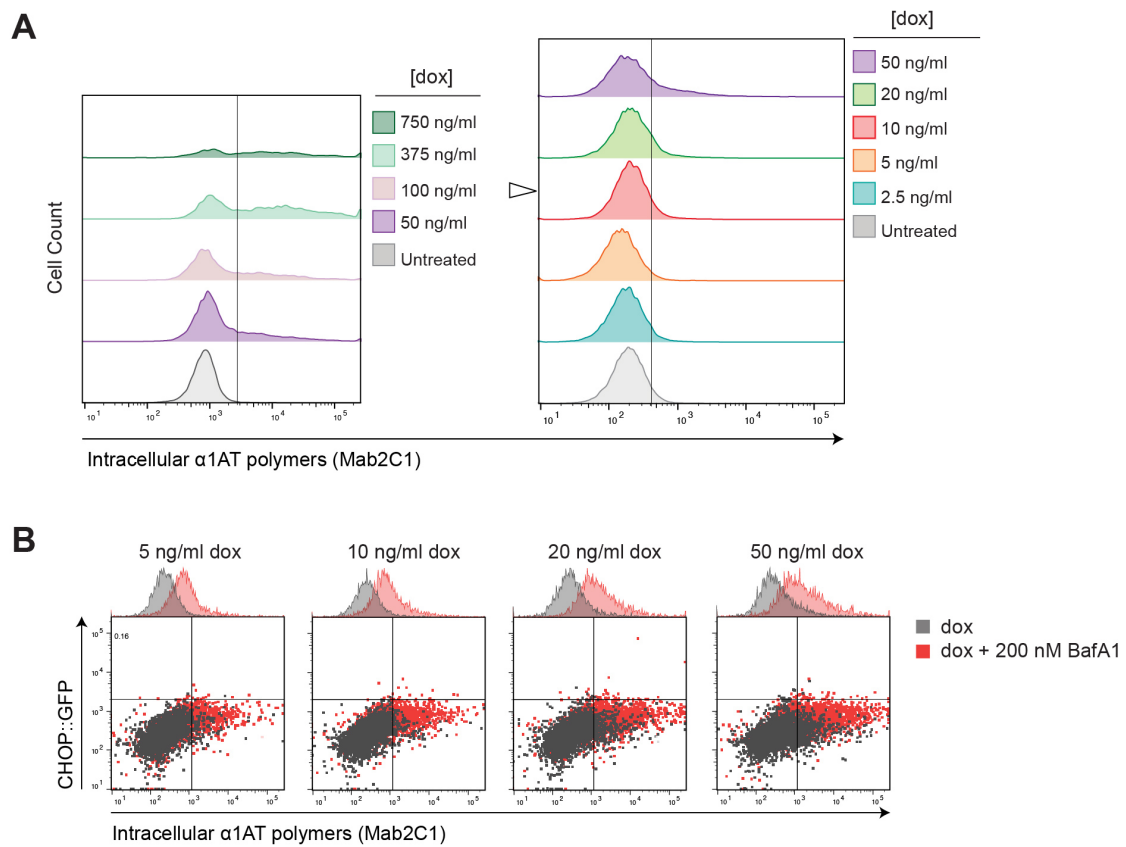

**Fig. S1. Concentration-dependence of the response of CHO-K1 Tet-on cells to doxycycline and bafilomycinA1.** (A) Flow cytometry analysis of the fluorescence intensity as a measure of intracellular  $\alpha$ 1AT polymer levels (stained with Mab2C1) in CHO-K1 Tet-on\_ $\alpha$ 1AT<sup>H334D</sup>\_Cas9 cells treated for 24 hrs with the indicated concentrations of doxycycline (dox). The left and right panels represent two independent experiments. The white arrowhead indicates the dox concentration used in the screen. (B) Dual-channel flow cytometry of the UPR marker, *CHOP::GFP*, and intracellular levels of  $\alpha$ 1AT polymers in CHO-K1 Tet-on\_ $\alpha$ 1AT<sup>H334D</sup>\_Cas9 cells treated for 24 hrs with the indicated concentration of dox in presence or absence of bafilomycinA1 (BafA1; 200 nM, added during the last 16 hrs). 5,000 cells were analysed.

715

716



## Trafficking of polymeric alpha1-antitrypsin

717

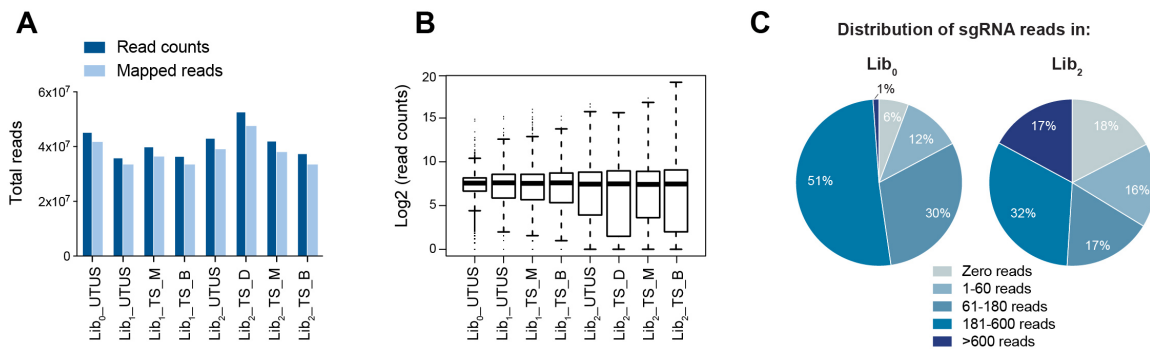

**Fig. S2. Quality control data analysis of the CRISPR/Cas9 screen performed by MAGeCK. (A)** Total read counts and reads mapped to the CHO library analysed by MAGeCK [UTUS: untreated (no doxycycline) and unsorted; TS: treated (plus doxycycline) and sorted; Lib<sub>0</sub>: unenriched library; Lib<sub>1</sub>: derivative enriched library 1; Lib<sub>2</sub>: derivative enriched library 2; B: brightest; M: medium-bright; D: dull]. **(B)** Frequency distribution of sgRNA in each sample, showing the median-normalised read counts. **(C)** Representation of sgRNAs in unsorted cells after infection with the unenriched genome-wide library (Lib<sub>0</sub>) and enriched library (Lib<sub>2</sub>) according to their read counts.

718

## Trafficking of polymeric alpha1-antitrypsin

719

### A Related to Fig. 5C

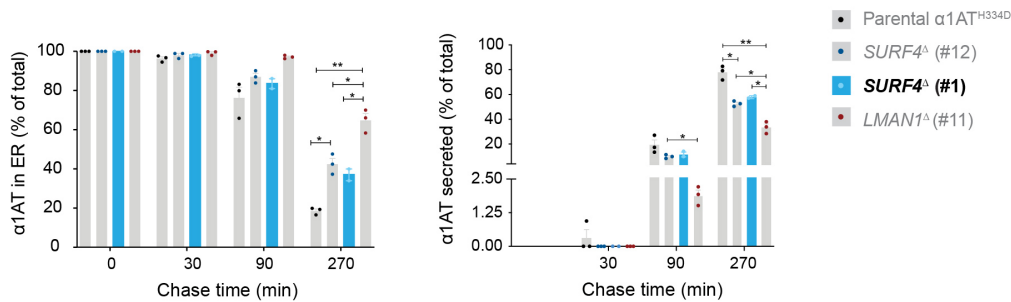

### B Related to Fig. 5D

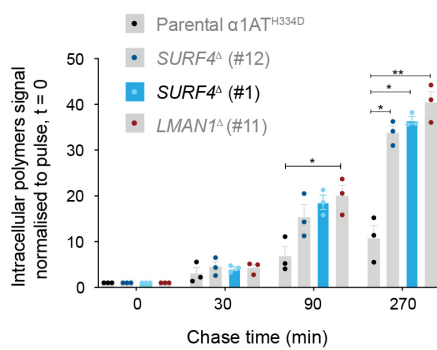

### C Related to Fig. 5E

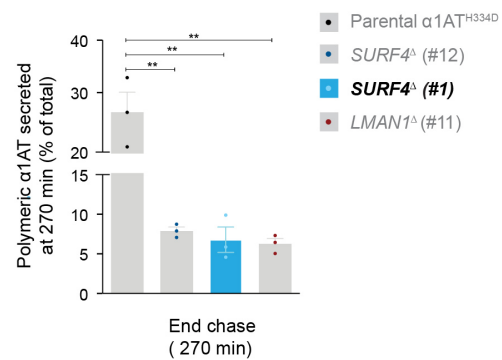

**Fig. S3. Altered intracellular trafficking of  $\alpha 1$ -antitrypsin in an additional  $\text{SURF4}^{\Delta}$  clone.** Labelled  $\alpha 1\text{AT}$  was immunoprecipitated with a polyclonal antibody reactive with all  $\alpha 1\text{AT}$  forms or a monoclonal antibody selective for  $\alpha 1\text{AT}$  polymers from lysates of parental CHO-K1 Tet-on- $\alpha 1\text{AT}^{\text{H334D}}$  cells and their  $\text{SURF4}^{\Delta}$  and  $\text{LMAN1}^{\Delta}$  derivatives or from the culture media supernatant. **(A) Related to Fig. 5C.** Plots of the percentage of  $\alpha 1\text{AT}$  retained in the ER (left panel) or secreted into the media (right panel) at the indicated times. The additional  $\text{SURF4}^{\Delta}$  disrupted clone [ $\text{SURF4}^{\Delta}$  (#1)] is highlighted in blue and the other three genotypes (previously shown in Fig. 5C) are coloured in grey. **(B) Related to Fig. 5D.** Plot of the intracellular polymer signal normalised to polymer  $\alpha 1\text{AT}$  signal at pulse end ( $t = 0$ ) at the indicated times. The additional  $\text{SURF4}^{\Delta}$  (#1) clone is highlighted in blue. **(C) Related to Fig. 5E.** Plot of the percentage of  $\alpha 1\text{AT}$  polymers present in the media at 270 min. The additional  $\text{SURF4}^{\Delta}$  (#1) clone is highlighted in blue. All quantitative plots show the mean  $\pm$  SEM of two or three independent experiments; \* $p < 0.05$ , \*\* $p < 0.01$ . Two-way (in 'A' and 'B') or one-way ANOVA (in 'C') followed by Tukey's post-hoc multiple comparison test.

720

721

## Trafficking of polymeric alpha1-antitrypsin

722

### A Related to Fig. 6C

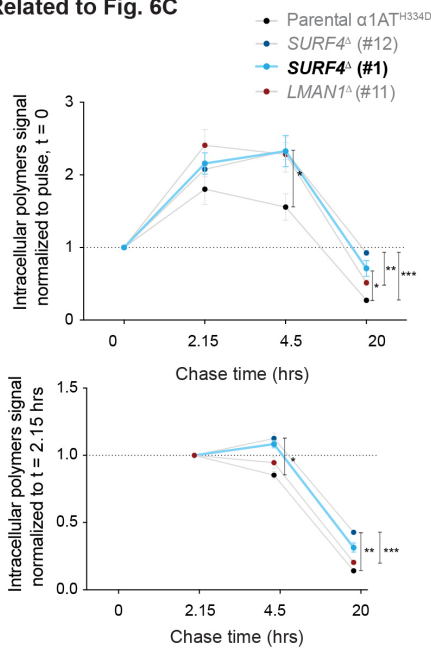

### B Related to Fig. 6D

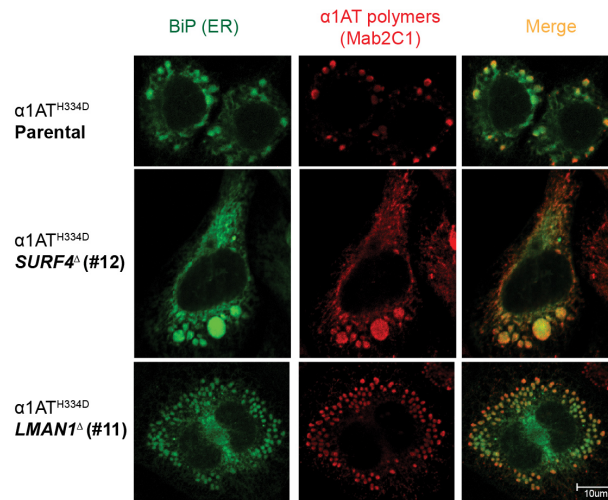

### C Related to Fig. 6E

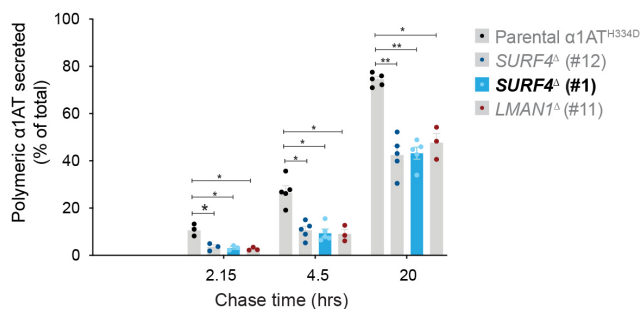

**Fig. S4. SURF4 favours ER exit of  $\alpha 1$ -antitrypsin polymers in an additional  $SURF4^{\Delta}$  clone.** Labelled  $\alpha 1AT$  was immunoprecipitated with a monoclonal antibody selective for  $\alpha 1AT$  polymers from lysates of parental CHO-K1 Tet-on- $\alpha 1AT^{H334D}$  cells and their  $SURF4^{\Delta}$  and  $LMAN1^{\Delta}$  derivatives or from the culture media supernatant. **(A) Related to Fig. 6C.** Plots of the cell-associated  $\alpha 1AT$  polymer signal at the indicated times, normalised to the signal at pulse end [t = 0, (upper panel)] or at 2.15 hrs (bottom panel). The additional SURF4 disrupted clone [ $SURF4^{\Delta}$  (#1)] is highlighted in blue and the other three genotypes (previously showed in Fig. 6C) are coloured in grey. **(B) Related to Fig. 6D.** Representative confocal immunofluorescence microscopy images of  $\alpha 1AT$  polymers (Mab2C1, red) together with an ER marker (BiP, green) in fixed parental CHO-K1 Tet-on- $\alpha 1AT^{H334D}$  cells and their  $SURF4^{\Delta}$  (#12) and  $LMAN1^{\Delta}$  (#11) derivatives clones.  $\alpha 1AT$  expression was induced with 500 ng/ml doxycycline for 24 hrs. **(C) Related to Fig. 6E.** Percentage of  $\alpha 1AT$  polymers present in the media at the indicated times. The additional  $SURF4^{\Delta}$  (#1) clone is highlighted in blue. All quantitative plots show the mean  $\pm$  SEM of three to five independent experiments; \* $p < 0.05$ , \*\* $p < 0.01$ , \*\*\* $p < 0.001$ , \*\*\*\* $p < 0.0001$ . Two-way ANOVA test followed by Tukey's post-hoc multiple comparison test.

723

724 **Supplementary Tables**

725 **Table S1: Rank of genes enriched in cells with the highest level of polymer**  
726 **signal (see attached file).** Rank of genes enriched in cells infected with the “derivative  
727 enriched Lib<sub>2</sub>” doxycycline-treated and sorted, relative to cells infected with the  
728 “unenriched Lib<sub>0</sub>” untreated and unsorted. Genes are ranked by "pos | rank" with  
729 *ATF7IP* (activating transcription factor 7 interacting protein) on the top of positively  
730 selected genes. The top 121 positively selected genes correspond to Fig. 2A.

731

## Trafficking of polymeric alpha1-antitrypsin

732 **Table S2: Recombinant DNA used in this study.**

| Lab ID | Plasmid name                                                         | Description                                                                                                     | Reference                                      |
|--------|----------------------------------------------------------------------|-----------------------------------------------------------------------------------------------------------------|------------------------------------------------|
| UK1610 | pSpCas9(BB)-2A-mCherry                                               | Modified pSpCas9(BB)-2A vector to express mCherry together with guide RNA & Cas9                                | Amin-Wetzel N et al., 2017                     |
| UK1700 | pMD2.G                                                               | Addgene plasmid 12259, lentiviral packaging helper, (VSVG)                                                      | Unpublished, gift from Didier Trono            |
| UK1701 | psPAX2                                                               | Addgene plasmid 12260, next gen lentiviral packaging helper                                                     | Unpublished, gift from Didier Trono            |
| UK1702 | LentiGuide-puro                                                      | Addgene plasmid 52963                                                                                           | Sanjana et al., 2014, gift from Feng Zhang     |
| UK1714 | Lenti-Cas9                                                           | Lenti-Cas9 in which 2TA-blast sequence is removed to make a lenti-Cas9 without resistance selection marker      | This study                                     |
| UK1717 | EGFPsgRNA_lentiGuide-Puro                                            | Lentiviral vector expressing EGFP CRISPR guides without expression of Cas9                                      | This study                                     |
| UK1789 | pKLV-U6gRNA(BbsI)-PGKpuro2ABFP                                       | Addgene 50946, BFP-2A-Puro tagged gRNAvector                                                                    | Koike-Yusa et al., 2014, gift from Kosuke Yusa |
| UK1857 | cgHSPA5_g1_pSpCas9(BB)-2A-mCherry                                    | mCherry-tagged CRISPR plasmid (UK1610) for targeting hamster HSPA5 (BiP)                                        | Preissler et al., 2017                         |
| UK1858 | cgHSPA5_g2_pSpCas9(BB)-2A-mCherry                                    | mCherry-tagged CRISPR plasmid (UK1610) for targeting hamster HSPA5 (BiP)                                        | Preissler et al., 2017                         |
| UK2561 | pKLV-CHO_libA-PGKpuro2ABFP (Library0)                                | CHO CRISPR KO library of 125030 selected guides for whole genome CRISPR screening                               | Unpublished                                    |
| UK2321 | pKLV-α1AT derivative enriched CHO library1 (MluI_BamHI)-PGKpuro2ABFP | CHO CRISPR KO derivative library 1 (Lib1) for α1AT polymer enrichment_Brightest population-After first sorting  | This study                                     |
| UK2378 | pKLV-α1AT derivative enriched CHO library2 (MluI_BamHI)-PGKpuro2ABFP | CHO CRISPR KO derivative library 2 (Lib2) for α1AT polymer enrichment_Brightest population-After second sorting | This study                                     |
| UK2501 | cgLman1_g1_exon 11_pSpCas9(BB)-2A-mCherry                            | mCherry-tagged CRISPR plasmid (UK1610) targeting cgLMAN1_guide 1                                                | This study                                     |
| UK2502 | cgLman1_g2_exon 9_pSpCas9(BB)-2A-mCherry                             | mCherry-tagged CRISPR plasmid (UK1610) targeting cgLMAN1_guide 2                                                | This study                                     |
| UK2503 | cgSurf4_g1_exon 5_pSpCas9(BB)-2A-mCherry                             | mCherry-tagged CRISPR plasmid (UK1610) targeting cgSURF4_guide 1                                                | This study                                     |
| UK2504 | cgSurf4_g2_exon 2_pSpCas9(BB)-2A-mCherry                             | mCherry-tagged CRISPR plasmid (UK1610) targeting cgSURF4_guide 2                                                | This study                                     |
| UK2505 | cgSec23b_g1_exon 7_pSpCas9(BB)-2A-mCherry                            | mCherry-tagged CRISPR plasmid (UK1610) targeting cgSEC23b_guide 1                                               | This study                                     |
| UK2506 | cgSec23b_g2_exon 13_pSpCas9(BB)-2A-mCherry                           | mCherry-tagged CRISPR plasmid (UK1610) targeting cgSEC23b_guide 2                                               | This study                                     |
| UK2549 | FLAG-tagged SURF4 [pNLF-FLAG-SURF4-puro)                             | FLAG-tagged SURF4 [pNLF-FLAG-SURF4-puro)                                                                        | Emmer et al., 2018, gift from David Ginsburg   |
| UK2622 | pNLF-H7-SURF4-puro                                                   | Mammalian expression plasmid 7xHis N-term tagged SURF4                                                          | This study                                     |

733

734

## Trafficking of polymeric alpha1-antitrypsin

735 **Table S3: List of sgRNAs and oligonucleotides used in this study.**

| Lab ID | Name                         | Sequence 5' – 3'                                                 | Comment                                                                                                | Reference               |
|--------|------------------------------|------------------------------------------------------------------|--------------------------------------------------------------------------------------------------------|-------------------------|
| 2486   | cgLman1_g1_e11_1S            | CACCGCTCATAGACGCCTG<br>CAGAGC                                    | CRISPR-Cas9 guide targeting<br>chinese hamster Lman1 exon 11                                           | This study              |
| 2487   | cgLman1_g1_e11_2A<br>S       | AAACGCTCTGCAGGCGTCT<br>ATGAGC                                    | CRISPR-Cas9 guide targeting<br>chinese hamster Lman1 exon 11                                           | This study              |
| 2488   | cgLman1_g2_e9_1S             | CACCGCTGGAGATCTCTT<br>CTGTCA                                     | CRISPR-Cas9 guide targeting<br>chinese hamster Lman1 exon 9                                            | This study              |
| 2489   | cgLman1_g2_e9_2A<br>S        | AAACTGACAGAAGAGATCT<br>CCAGGC                                    | CRISPR-Cas9 guide targeting<br>chinese hamster Lman1 exon 9                                            | This study              |
| 2490   | cgSurf4_g1_e5_1S             | CACCGCTTAGGGGAGCTCT<br>CACGCA                                    | CRISPR-Cas9 guide targeting<br>chinese hamster Surf4 exon 5                                            | This study              |
| 2491   | cgSurf4_g1_e5_2AS            | AAACTGCGTGAGAGCTCCC<br>CTAAGC                                    | CRISPR-Cas9 guide targeting<br>chinese hamster Surf4 exon 5                                            | This study              |
| 2492   | cgSurf4_g2_e2_1S             | CACCGCATCCGCATGTGGT<br>TTCAG                                     | CRISPR-Cas9 guide targeting<br>chinese hamster Surf4 exon 2                                            | This study              |
| 2493   | cgSurf4_g2_e2_2AS            | AAACCTGAAACCACATGCG<br>GATGC                                     | CRISPR-Cas9 guide targeting<br>chinese hamster Surf4 exon 2                                            | This study              |
| 2494   | cgSec23b_g1_e7_1S            | CACCGATATCGTGCCAGGA<br>ACGAAT                                    | CRISPR-Cas9 guide targeting<br>chinese hamster Sec23b exon 7                                           | This study              |
| 2495   | cgSec23b_g1_e7_2A<br>S       | AAACATTGTTCTTCTGGCAC<br>GATATC                                   | CRISPR-Cas9 guide targeting<br>chinese hamster Sec23b exon 7                                           | This study              |
| 2496   | cgSec23b_g2_e13_1<br>S       | CACCGCAGTCTTGATGGCA<br>CGGCT                                     | CRISPR-Cas9 guide targeting<br>chinese hamster Sec23b exon 13                                          | This study              |
| 2497   | cgSec23b_g2_e13_2<br>AS      | AAACAGCCGTGCCATCAAG<br>ACTGC                                     | CRISPR-Cas9 guide targeting<br>chinese hamster Sec23b exon 13                                          | This study              |
| 2547   | cgSurf4_e2_1S                | ACCAAGCAGTACCTGCCTC<br>A                                         | for sequencing CRISPR mutants<br>made in the cgSurf4 locus                                             | This study              |
| 2548   | cgSurf4_e2_2AS               | ACACAAAGGATGAGGCCAA<br>C                                         | for sequencing CRISPR mutants<br>made in the cgSurf4 locus                                             | This study              |
| 2549   | cgSurf4_e5_1S                | GAGGTTTGCTGCTGCTCTT<br>G                                         | for sequencing CRISPR mutants<br>made in the cgSurf4 locus                                             | This study              |
| 2550   | cgSurf4_e5_2AS               | AGCTGGCATCAAAGTGAAG<br>G                                         | for sequencing CRISPR mutants<br>made in the cgSurf4 locus                                             | This study              |
| 2516   | cgLman1_e11_1S               | GAACTCCATGAGTGAAACA<br>GTCC                                      | for sequencing CRISPR mutants<br>made in the cgLman1 locus                                             | This study              |
| 2517   | cgLman1_e11_2AS              | ATGTTGCGCTGAGCAAGG                                               | for sequencing CRISPR mutants<br>made in the cgLman1 locus                                             | This study              |
| 2518   | cgLman1_e9_1S                | CGATCGCGAGCTAAGACAA<br>G                                         | for sequencing CRISPR mutants<br>made in the cgLman1 locus                                             | This study              |
| 2519   | cgLman1_e9_2AS               | CTGGAGCATTGAGGGAA<br>C                                           | for sequencing CRISPR mutants<br>made in the cgLman1 locus                                             | This study              |
| 2528   | cgSec23b_e7_1S               | GGATCATGCTGTTCACTGG<br>A                                         | for sequencing CRISPR mutants<br>made in the cgSec23b locus                                            | This study              |
| 2529   | cgSec23b_e7_2AS              | AGTGACAGCTGGAATCCAC<br>A                                         | for sequencing CRISPR mutants<br>made in the cgSec23b locus                                            | This study              |
| 2182   | sgRNA_outer_Mlul_s<br>hort_F | CAGCAGAGATCCAGTTTGG<br>TTAGTACC                                  | primer for PCR of pKLV<br>CHO_CRISPR library for recloning<br>in UK1789                                | This study              |
| 1432   | P5-sgRNA_inner_F             | AATGATACGGCGACCACCG<br>AGATCTACACTCTCTTGTGG<br>AAAGGACGAAACACCG  | primer for barcoding and adapting<br>plentiGuide PCR products from<br>CRISPR library screening for NGS | Harding et<br>al., 2019 |
| 1434   | sgRNA_outer_short_<br>F      | GCTTACCCTAACTTGAAGT<br>ATTCG                                     | primer for barcoding and adapting<br>plentiGuide PCR products from<br>CRISPR library screening for NGS | Harding et<br>al., 2019 |
| 1435   | Illumina-sgRNA_seq           | ACACTCTCTTGTGGAAAGG<br>ACGAAACACCG                               | PAGE purified primer for NGS of<br>PCR products from CRISPR<br>library screening                       | Harding et<br>al., 2019 |
| 1758   | sgRNA_outer_short_<br>R2     | GAATGTGTGCGAGGCCAGA<br>G                                         | primer for 1st round PCR of pKLV<br>CHO_CRISPR library for NGS<br>sequencing                           | Harding et<br>al., 2019 |
| 1759   | pKLV_NEBNXT01                | CAAGCAGAAGACGGCATA<br>GAGATCGTGATGTGACTGG<br>AGTTCAGACGTGTGCTCTT | primer for barcoding and adapting<br>pKLV CHO_CRISPR PCR                                               | Harding et<br>al., 2019 |

## Trafficking of polymeric alpha1-antitrypsin

|      |                             |                                                                                                        |                                                                              |                      |
|------|-----------------------------|--------------------------------------------------------------------------------------------------------|------------------------------------------------------------------------------|----------------------|
|      |                             | CCGATCTGAGGCCACTTGT<br>GTAGCGCCAAG                                                                     | products for NGS                                                             |                      |
| 1760 | pKLV_NEBNXT02               | CAAGCAGAAGACGGCATA<br>GAGATACATCGGTGACTGG<br>AGTTCAGACGTGTGCTCT<br>CCGATCTGAGGCCACTTGT<br>GTAGCGCCAAG  | primer for barcoding and adapting<br>pKLV CHO_CRISPR PCR<br>products for NGS | Harding et al., 2019 |
| 1761 | pKLV_NEBNXT03               | CAAGCAGAAGACGGCATA<br>GAGATTGCCTAAGTGACTG<br>GAGTTCAGACGTGTGCTCT<br>TCCGATCTGAGGCCACTTG<br>GTAGCGCCAAG | primer for barcoding and adapting<br>pKLV CHO_CRISPR PCR<br>products for NGS | Harding et al., 2019 |
| 1762 | pKLV_NEBNXT04               | CAAGCAGAAGACGGCATA<br>GAGATTGGTCAGTGACTGG<br>AGTTCAGACGTGTGCTCT<br>CCGATCTGAGGCCACTTGT<br>GTAGCGCCAAG  | primer for barcoding and adapting<br>pKLV CHO_CRISPR PCR<br>products for NGS | Harding et al., 2019 |
| 1763 | pKLV_NEBNXT05               | CAAGCAGAAGACGGCATA<br>GAGATCACTGTGTGACTGG<br>AGTTCAGACGTGTGCTCT<br>CCGATCTGAGGCCACTTGT<br>GTAGCGCCAAG  | primer for barcoding and adapting<br>pKLV CHO_CRISPR PCR<br>products for NGS | Harding et al., 2019 |
| 1764 | pKLV_NEBNXT06               | CAAGCAGAAGACGGCATA<br>GAGATTATTGGCGTGACTG<br>GAGTTCAGACGTGTGCTCT<br>TCCGATCTGAGGCCACTTG<br>GTAGCGCCAAG | primer for barcoding and adapting<br>pKLV CHO_CRISPR PCR<br>products for NGS | Harding et al., 2019 |
| 1765 | pKLV_NEBNXT07               | CAAGCAGAAGACGGCATA<br>GAGATTGATCTGGTGACTG<br>GAGTTCAGACGTGTGCTCT<br>TCCGATCTGAGGCCACTTG<br>GTAGCGCCAAG | primer for barcoding and adapting<br>pKLV CHO_CRISPR PCR<br>products for NGS | Harding et al., 2019 |
| 1766 | pKLV_NEBNXT08               | CAAGCAGAAGACGGCATA<br>GAGATTTCAAGTGTGACTG<br>GAGTTCAGACGTGTGCTCT<br>TCCGATCTGAGGCCACTTG<br>GTAGCGCCAAG | primer for barcoding and adapting<br>pKLV CHO_CRISPR PCR<br>products for NGS | Harding et al., 2019 |
| 1767 | pKLV_NEBNXT09               | CAAGCAGAAGACGGCATA<br>GAGATTCTGATCGTGACTG<br>GAGTTCAGACGTGTGCTCT<br>TCCGATCTGAGGCCACTTG<br>GTAGCGCCAAG | primer for barcoding and adapting<br>pKLV CHO_CRISPR PCR<br>products for NGS | Harding et al., 2019 |
| 1768 | pKLV_NEBNXT10               | CAAGCAGAAGACGGCATA<br>GAGATAAGCTAGTGACTGG<br>AGTTCAGACGTGTGCTCT<br>CCGATCTGAGGCCACTTGT<br>GTAGCGCCAAG  | primer for barcoding and adapting<br>pKLV CHO_CRISPR PCR<br>products for NGS | Harding et al., 2019 |
| 1769 | pKLV_NEBNXT11               | CAAGCAGAAGACGGCATA<br>GAGATTGTAGCCGTGACTG<br>GAGTTCAGACGTGTGCTCT<br>TCCGATCTGAGGCCACTTG<br>GTAGCGCCAAG | primer for barcoding and adapting<br>pKLV CHO_CRISPR PCR<br>products for NGS | Harding et al., 2019 |
| 2606 | cgSurf4_exon4_6FA<br>M_2AS  | [6FAM]AGCTGGCATCAAAGT<br>GAAGG                                                                         | oligo 2550 with 5'-[6FAM] for<br>screening for efficient CRISPRs             | This study           |
| 2607 | cgSurf4_exon1_6FA<br>M_2AS  | [6FAM]ACACAAAGGATGAG<br>GCCAAC                                                                         | oligo 2548 with 5'-[6FAM] for<br>screening for efficient CRISPRs             | This study           |
| 2665 | cgLman1_exon10_6F<br>AM_2AS | [6FAM]ATGTTGCGCTGAGC<br>AAGG                                                                           | oligo 2517 with 5'-[6FAM] for<br>screening for efficient CRISPRs             | This study           |
| 2666 | cgLman1_exon8_6FA<br>M_2AS  | [6FAM]CTGGAGCATTTTGAG<br>GGAAC                                                                         | oligo 2519 with 5'-[6FAM] for<br>screening for efficient CRISPRs             | This study           |
| 1402 | EGFP_guide1_1S              | CACCGGGCGAGGAGCTGTT<br>CACCG                                                                           | CRISPR-Cas9 guide targeting<br>targeting EGFP                                | This study           |
| 1403 | EGFP_guide1_2AS             | AAACCGGTGAACAGCTCCT<br>CGCCC                                                                           | CRISPR-Cas9 guide targeting<br>targeting EGFP                                | This study           |

Trafficking of polymeric alpha1-antitrypsin

737 **Table S4: List of antibodies, reagents and software used in this study.**

| Reagent or Resource                                                      | Source                   | Identifier  |
|--------------------------------------------------------------------------|--------------------------|-------------|
| <b>Antibodies</b>                                                        |                          |             |
| Monoclonal Mouse anti- $\alpha$ 1AT polymer-specific 2C1                 | Miranda et al., 2010     | Mab2C1      |
| Monoclonal Mouse anti-total $\alpha$ 1AT 3C11                            | Tan et al., 2015         | Mab3C11     |
| Polyclonal Rabbit anti-total $\alpha$ 1AT                                | Agilent, Dako            | A0012       |
| Polyclonal Rabbit anti-ERGIC-53                                          | Sigma                    | E1031       |
| Polyclonal Rabbit anti-SURF4                                             | Invitrogen               | PA5-69676   |
| Monoclonal Mouse anti FLAG-M2                                            | Sigma                    | F1804       |
| Polyclonal Rabbit anti-cyclophilin B                                     | Abcam                    | AB16045     |
| Monoclonal Mouse anti-actin                                              | Abcam                    | AB3280      |
| Polyclonal Chicken anti-hamsterBiP                                       | Avezov et al., 2013      | anti-BiP    |
| Goat anti-Mouse IgG (H+L) Cross-Adsorbed Secondary Antibody, DyLight 633 | Thermo Fisher Scientific | 35513       |
| <b>Chemicals</b>                                                         |                          |             |
| Doxycycline                                                              | Sigma                    | D9861       |
| DMEM                                                                     | Sigma                    | D6429       |
| Tet Free Serum                                                           | Pan-Biotech              | P30-3602    |
| HyClone II Serum                                                         | Thermo Fisher Scientific | SH30066.03  |
| Penicillin/Streptomycin                                                  | Sigma                    | P0781       |
| L-glutamine                                                              | Sigma                    | G7513       |
| Non-essential amino acids solution                                       | Sigma                    | M7145       |
| Nutrient Mixture F12                                                     | Sigma                    | N4888       |
| Lipofectamine LTX                                                        | Thermo Fisher Scientific | A12621      |
| Bafilomycin A1                                                           | Sigma                    | B1793       |
| Dithiobis(succinimidyl propionate) (DSP)                                 | Thermo Scientific Pierce | 22585       |
| Puromycin                                                                | MERCK-milipore           | 540222      |
| EDTA-free Protease inhibitor Cocktail                                    | Roche                    | 11873580001 |
| DMEM (-Glu/-Met/-Cys)                                                    | Gibco                    | 21013024    |
| Easy TagTM Express <sup>35</sup> S Protein Labelling Mix                 | Perkin Elmer             | NEG072007MC |
| Protein A-Sepharose                                                      | Sigma                    | P3391       |
| Protein G- Sepharose 4B fast flow                                        | Sigma                    | P3296       |
| Anti-FLAG M2 Affinity Gel                                                | Sigma                    | F3165       |
| Ni-NTA Agarose beads                                                     | Qiagen                   | 30210       |
| <b>Experimental Models: Cell lines</b>                                   |                          |             |
| CHO-K1 Tet-on $\alpha$ 1AT <sup>H334D</sup> CHOP::GFP_Cas9               | This study               |             |
| CHO-K1 Tet-on $\alpha$ 1AT <sup>H334D</sup> CHOP::GFP                    | This study               |             |
| CHO-K1 Tet-on $\alpha$ 1AT <sup>WT</sup> CHOP::GFP                       | This study               |             |
| CHO-K1 Tet-on $\alpha$ 1AT <sup>H334D</sup>                              | Ordonez et al., 2013     |             |
| CHO-K1 Tet-on $\alpha$ 1AT <sup>WT</sup>                                 | Ordonez et al., 2013     |             |
| CHO-S21                                                                  | Sekine et al., 2016      |             |
| <b>Software and Algorithms</b>                                           |                          |             |
| MAGeCK                                                                   | Li et al., 2014          |             |
| Metascape                                                                | Zhou et al., 2019        |             |
| MacVector                                                                |                          |             |
| Photoshop and Illustrator                                                |                          |             |
| FlowJo                                                                   |                          |             |
| ImageJ                                                                   |                          |             |
| GraphPad-Prism V8                                                        |                          |             |
| Velocity V6.3                                                            | Perkin Elmer             |             |

738



Trafficking of polymeric alpha1-antitrypsin

739 **Table S5: Clones generated in this study.**

| Gene targeting | Cell line                                                 | Clone | Exon | Allele | Amino acid sequence (number shows amino acid position at which insert/deletion occurred)                                        |
|----------------|-----------------------------------------------------------|-------|------|--------|---------------------------------------------------------------------------------------------------------------------------------|
| <i>SURF4</i>   | CHO-K1 Tet-on<br>$\alpha$ 1AT <sup>H334D</sup> _CHOP::GFP | #12   | 5    | 1      | ....VTMR149in*                                                                                                                  |
|                |                                                           |       |      | 2      | ....VTMR149in*                                                                                                                  |
|                |                                                           | #1    | 2    | 1      | ....DGIR44delISGVSNVTILTLPGAVATCWP<br>HPLCSSTSWDS*                                                                              |
|                |                                                           |       |      | 2      | $\Delta$ W45-Q47                                                                                                                |
| <i>LMAN1</i>   | CHO-K1 Tet-on<br>$\alpha$ 1AT <sup>WT</sup> _CHOP::GFP    | #21   | 5    | 1      | ....VTMR149in*                                                                                                                  |
|                |                                                           |       |      | 2      | ....VTMR149inLRGHPDRQAEGDQGWPPA<br>LRLVRAPLSSTCNLEEGSCWS*                                                                       |
|                |                                                           | #11   | 9    | 1      | ....VSSL375delIRRDLQERSGDPRAAWAGL<br>STGTRYSCENPA*                                                                              |
|                |                                                           |       |      | 2      | ....VSSL375delIKKRSPGEERGPQGS LGRS<br>LNRN*                                                                                     |
| <i>SEC23B</i>  | CHO-K1 Tet-on<br>$\alpha$ 1AT <sup>H334D</sup> _CHOP::GFP | #14   | 11   | 1      | ....QHPG433indelVYETTSALHGHQRAPAC<br>REERY*                                                                                     |
|                |                                                           |       |      | 2      | ....QHPG433inWHVVALAPVLVASGQHLVV<br>DGVVLQKALRHD MVHIVVGPVDVQFLVH<br>VHIPILQVVQVQLLVQLGVFHGVFFQDL<br>AAQLFDAXXDPXXSLAAVLLSRRRL* |
|                |                                                           | #8    | 9    | 1      | ....VSSL375delRSPGEERGPQGS LGRSLN<br>RN*                                                                                        |
|                |                                                           |       |      | 2      | ....VSSL375delIKKRSPGEERGPQGS LGRS<br>LNRN*                                                                                     |
| <i>SEC23B</i>  | CHO-K1 Tet-on<br>$\alpha$ 1AT <sup>H334D</sup> _CHOP::GFP | #1    | 7    | 1      | ....KTP313delIIPGTILKKIMHGS*                                                                                                    |
|                |                                                           |       |      | 2      | ....KTP313delIIPGTILKKIMHGS*                                                                                                    |

740
